# Supplementary material for: Targets of drugs are generally, and targets of drugs having side effects are specifically good spreaders of human interactome perturbations
Source: PubMed Central journal article supplement (PMC4426692; doi:10.1038/srep10182), 2015-05-11
Supplement: srep10182-s1.pdf [file srep10182-s1.pdf]

## Supplementary Information

### Targets of drugs are generally, and targets of drugs having side effects are specifically good spreaders of human interactome perturbations

Áron R. Perez-Lopez<sup>1,\*</sup>, Kristóf Z. Szalay<sup>1</sup>, Dénes Türei<sup>2,+</sup>, Dezső Módos<sup>2,3</sup>, Katalin Lenti<sup>3</sup>, Tamás Korcsmáros<sup>2,4,5</sup> and Peter Csermely<sup>1,#</sup>

**1** Department of Medical Chemistry, Semmelweis University, P.O. Box 260, H-1444 Budapest 8, Hungary; **2** Department of Genetics, Eötvös Loránd University, Pázmány P. s. 1C, H-1117 Budapest, Hungary; **3** Department of Morphology and Physiology, Faculty of Health Sciences, Semmelweis University, Vas u. 17, H-1088 Budapest, Hungary; **4** TGAC, The Genome Analysis Centre, Norwich, UK; **5** Gut Health and Food Safety Programme, Institute of Food Research, Norwich, UK

\*Áron R. Perez Lopez is a high school student of the Apáczai Csere János High School of the Eötvös Loránd University, Papnövelde u. 4-6, H-1053 Budapest, Hungary; +current address: European Bioinformatics Institute (EMBL-EBI), Wellcome Trust Genome Campus, Cambridge CB10 1SD, UK  
#Corresponding author, E-mail: [csermely.peter@med.semmelweis-univ.hu](mailto:csermely.peter@med.semmelweis-univ.hu)

## Table of Contents

|                                                                                                                                                                                                                 |          |
|-----------------------------------------------------------------------------------------------------------------------------------------------------------------------------------------------------------------|----------|
| <b>Supplementary Figures</b> .....                                                                                                                                                                              | <b>3</b> |
| Figure 1   Cumulative silencing time distribution of drug targets and non-target proteins with a starting energy of 10,000 and a dissipation value of 5.....                                                    | 3        |
| Figure 2   Cumulative silencing time distribution of drug targets and non-target proteins with a starting energy of 10,000 and a dissipation value of 1.....                                                    | 4        |
| Figure 3   Cumulative silencing time distribution of drugs and non-target proteins with starting energy of 1,000 and a dissipation value of 5 with distributed starting energy among multiple targets.....      | 5        |
| Figure 4   Cumulative silencing time distribution of drug target proteins and non-target proteins with a starting energy of 1000 and a dissipation value of 5 using a 50% smaller interactome.....              | 6        |
| Figure 5   Cumulative perturbation reach distribution of drug targets and non-target proteins with a starting energy of 10,000 and a dissipation value of 5.....                                                | 7        |
| Figure 6   Cumulative perturbation reach distribution of drug targets and non-target proteins with a starting energy of 10,000 and a dissipation value of 1.....                                                | 8        |
| Figure 7   Cumulative perturbation reach distribution of drugs and non-target proteins with starting energy of 10,000 and a dissipation value of 1 with distributed starting energy among multiple targets..... | 9        |
| Figure 8   Cumulative silencing time distribution of targets of drugs used in the treatment of colorectal cancer and type 2 diabetes mellitus .....                                                             | 10       |
| Figure 9   Human interactome distance between drug targets used in the treatment of colorectal cancer and type 2 diabetes, between proteins related to these diseases and randomly selected proteins .....      | 11       |

|                                                                                                                                                                                                  |           |
|--------------------------------------------------------------------------------------------------------------------------------------------------------------------------------------------------|-----------|
| Figure 10   Human protein-protein interaction network of the proteins related to colorectal cancer and type 2 diabetes and the drug targets used in the treatment of these diseases .....        | 13        |
| <b>Supplementary Tables.....</b>                                                                                                                                                                 | <b>15</b> |
| Table 1   Drugs obtained from the DrugBank database, which have known side effects in the SIDER database .....                                                                                   | 15        |
| Table 2   The keywords used in the filtering of the DrugBank database and their occurrences .....                                                                                                | 21        |
| Table 3   Drugs obtained from the DrugBank database, which are used in the treatment of colorectal cancer and have no reported side effects in the SIDER database and their target proteins..... | 22        |
| Table 4   Drugs obtained from the DrugBank database, which are used in the treatment of colorectal cancer and have known side effects in the SIDER database and their target proteins.....       | 23        |
| Table 5   Drugs obtained from the DrugBank database, which are used in the treatment of type 2 diabetes and have no reported side effects in the SIDER database and their target proteins.....   | 24        |
| Table 6   Drugs obtained from the DrugBank database, which are used in the treatment of type 2 diabetes and have known side effects in the SIDER database and their target proteins.....         | 25        |
| Table 7   Mutated genes in colorectal cancer and their corresponding proteins .....                                                                                                              | 26        |
| Table 8   Mutated genes in type 2 diabetes and their corresponding proteins .....                                                                                                                | 27        |
| Table 9   Average human interactome centralities of target proteins of drugs against colorectal cancer and type 2 diabetes.....                                                                  | 28        |
| Table 10   Average network distance between drug targets without known side effects used in the treatment of colorectal cancer and colorectal cancer-associated proteins .....                   | 29        |
| Table 11   Average network distance between drug targets with known side effects used in the treatment of colorectal cancer and colorectal cancer-associated proteins .....                      | 30        |
| Table 12   Average network distance between drug targets without known side effects used in the treatment of type 2 diabetes and diabetes-associated proteins .....                              | 31        |
| Table 13   Average network distance between drug targets with known side effects used in the treatment of type 2 diabetes and diabetes-associated proteins.....                                  | 32        |
| <b>Supplementary References.....</b>                                                                                                                                                             | <b>33</b> |

## Supplementary Figures

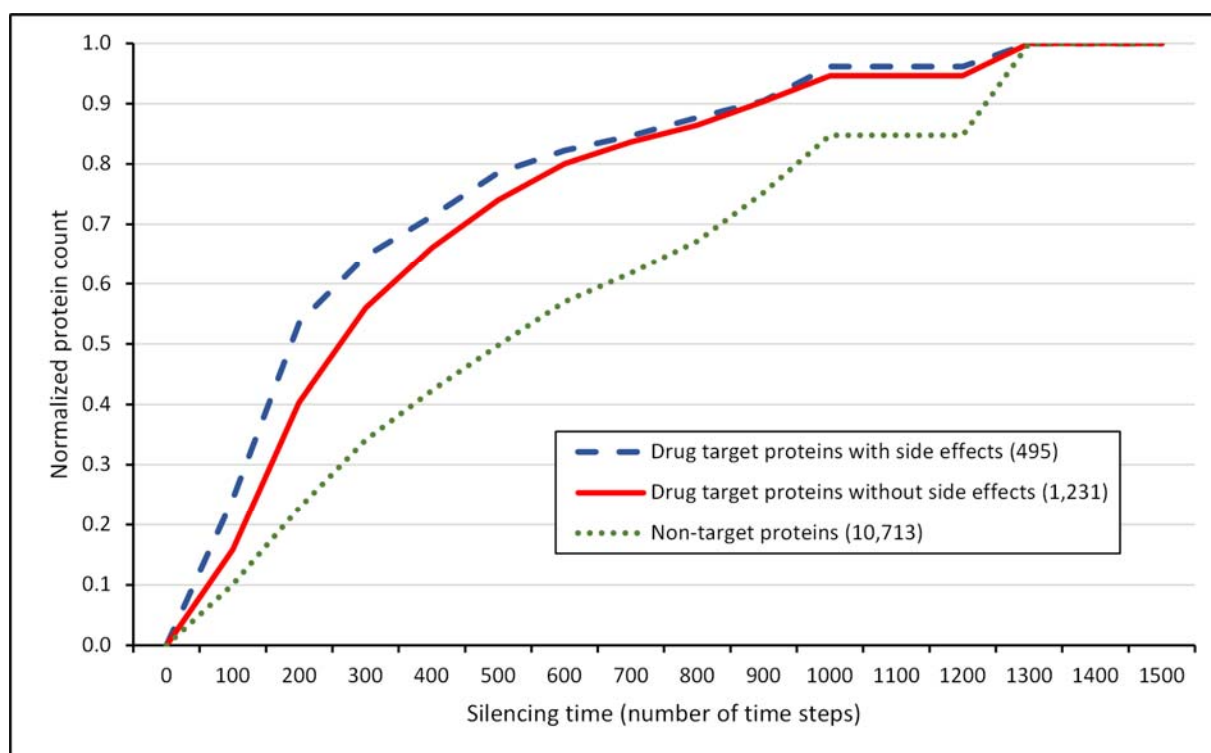

**Figure 1 | Cumulative silencing time distribution of drug targets and non-target proteins with a starting energy of 10,000 and a dissipation value of 5.** The diagram shows the cumulative distribution of the normalized number of proteins with given silencing times, which are drug targets with known side effects (blue dashed line), which are drug targets without known side effects (red solid line) and which are not drug targets (green dotted line). The number of proteins was normalized by dividing the number of proteins in each silencing time range by the total number of proteins allowing a better comparison. The total number of drug targets with and without side effects, and non-target proteins was 495, 1,231 and 10,713, respectively. The figure shows the 99.99% of all proteins (having a silencing time below 1500). The human interactome containing 12,439 proteins and 174,666 edges was built from the STRING database<sup>1</sup>, 1,726 human drug targets were obtained from the DrugBank database<sup>2</sup> and 99,423 drug-side effect pairs were taken from the SIDER database<sup>3</sup>. Silencing times were calculated separately for every protein with the Turbine program<sup>4</sup> as described in the Methods section of the main text with a starting energy of 10,000 and a dissipation value of 5 units. Statistical analysis was performed using the Mann-Whitney (Wilcoxon rank sum) test function of the R package<sup>5</sup>. There was a statistically significant difference ( $p=1.701e-5$ ) between the silencing times of drug targets with known side effects and the silencing times of drug targets without known side effects. The difference between the silencing times of drug targets and non-target proteins was also statistically significant ( $p=2.2e-16$ ).

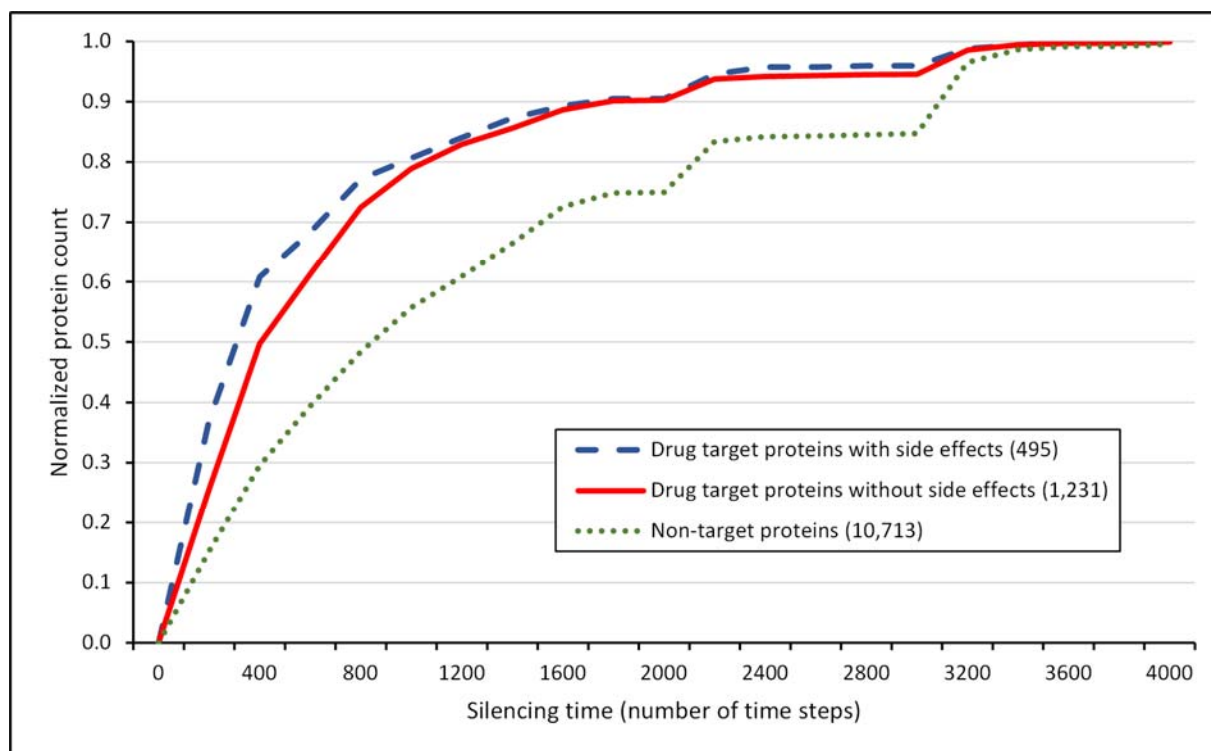

**Figure 2 | Cumulative silencing time distribution of drug targets and non-target proteins with a starting energy of 10,000 and a dissipation value of 1.** The diagram shows the cumulative distribution of the normalized number of proteins with given silencing times, which are drug targets with known side effects (blue dashed line), which are drug targets without known side effects (red solid line) and which are not drug targets (green dotted line). The number of proteins was normalized by dividing the number of proteins in each silencing time range by the total number of proteins allowing a better comparison. The total number of drug targets with and without side effects, and non-target proteins was 495, 1,231 and 10,713, respectively. The figure shows 99.61% of all proteins (having a silencing time below 4000). The human interactome containing 12,439 proteins and 174,666 edges was built from the STRING database<sup>1</sup>, 1,726 human drug targets were obtained from the DrugBank database<sup>2</sup> and 99,423 drug-side effect pairs were taken from the SIDER database<sup>3</sup>. Silencing times were calculated separately for every protein with the Turbine program<sup>4</sup> as described in the Methods section of the main text with a starting energy of 10,000 and a dissipation value of 1 unit. Statistical analysis was performed using the Mann-Whitney (Wilcoxon rank sum) test function of the R package<sup>5</sup>. There was a statistically significant difference ( $p=9.635e-6$ ) between the silencing times of drug targets with known side effects and the silencing times of drug targets without known side effects. The difference between the silencing times of drug targets and non-target proteins was also statistically significant ( $p=2.2e-16$ ).

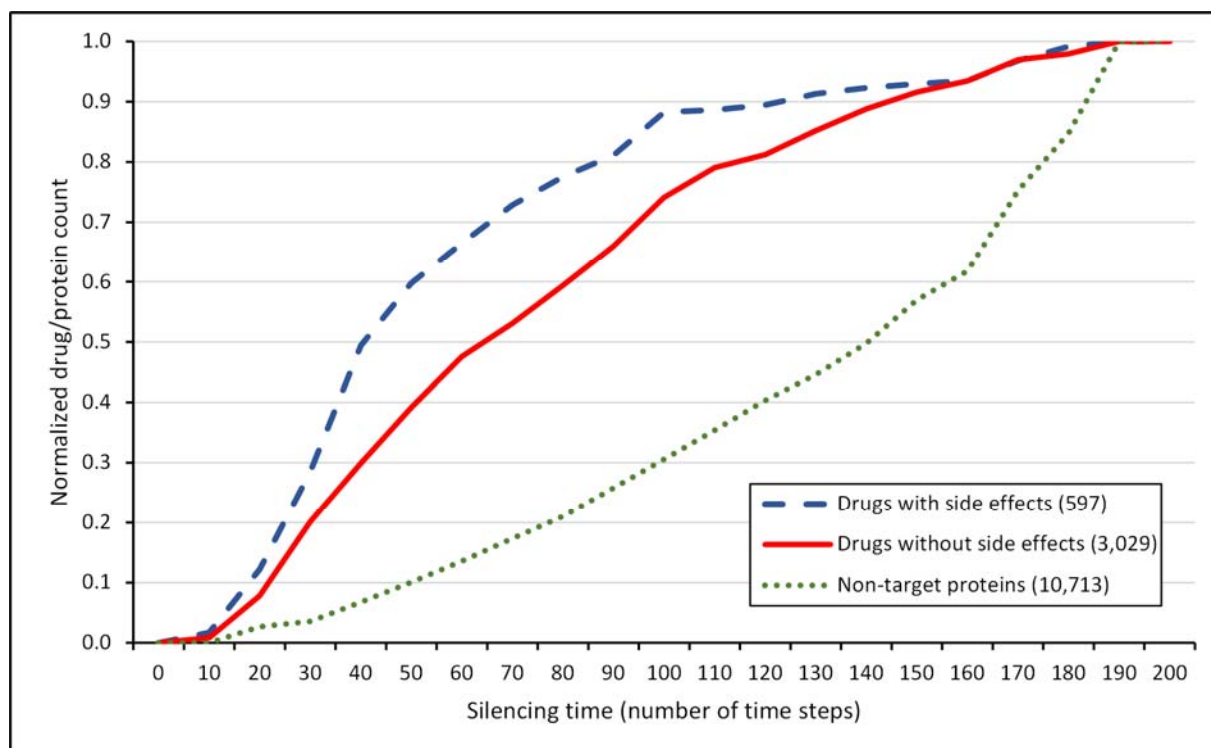

**Figure 3 | Cumulative silencing time distribution of drugs and non-target proteins with starting energy of 1,000 and a dissipation value of 5 with distributed starting energy among multiple targets.** The diagram shows the cumulative silencing time distribution of the normalized number of drugs with known side effects (blue dashed line), drugs without known side effects (red solid line) and non-target proteins (green dotted line). The number of proteins/drugs was normalized by dividing the number of proteins/drugs in each silencing time range by the total number of proteins/drugs allowing a better comparison. The total number of drugs with and without side effects, and non-target proteins was 597, 3,029 and 10,713, respectively. The human interactome containing 12,439 proteins and 174,666 edges was built from the STRING database<sup>1</sup>, 3,626 human drugs were obtained from the DrugBank database<sup>2</sup> and 99,423 drug-side effect pairs were taken from the SIDER database<sup>3</sup>. Silencing times were calculated separately for every protein/drug with the Turbine program<sup>4</sup> as described in the Methods section of the main text with a starting energy of 1000 and a dissipation value of 5 units. In case of drugs with multiple targets, the starting energy was distributed evenly among the drug targets. Statistical analysis was performed using the Mann-Whitney (Wilcoxon rank sum) test function of the R package<sup>5</sup>. There was a statistically significant difference ( $p=2.2e-16$ ) between the silencing times of drugs with known side effects and the silencing times of drugs without known side effects. The difference between the silencing times of drugs and non-target proteins was also statistically significant ( $p=2.2e-16$ ).

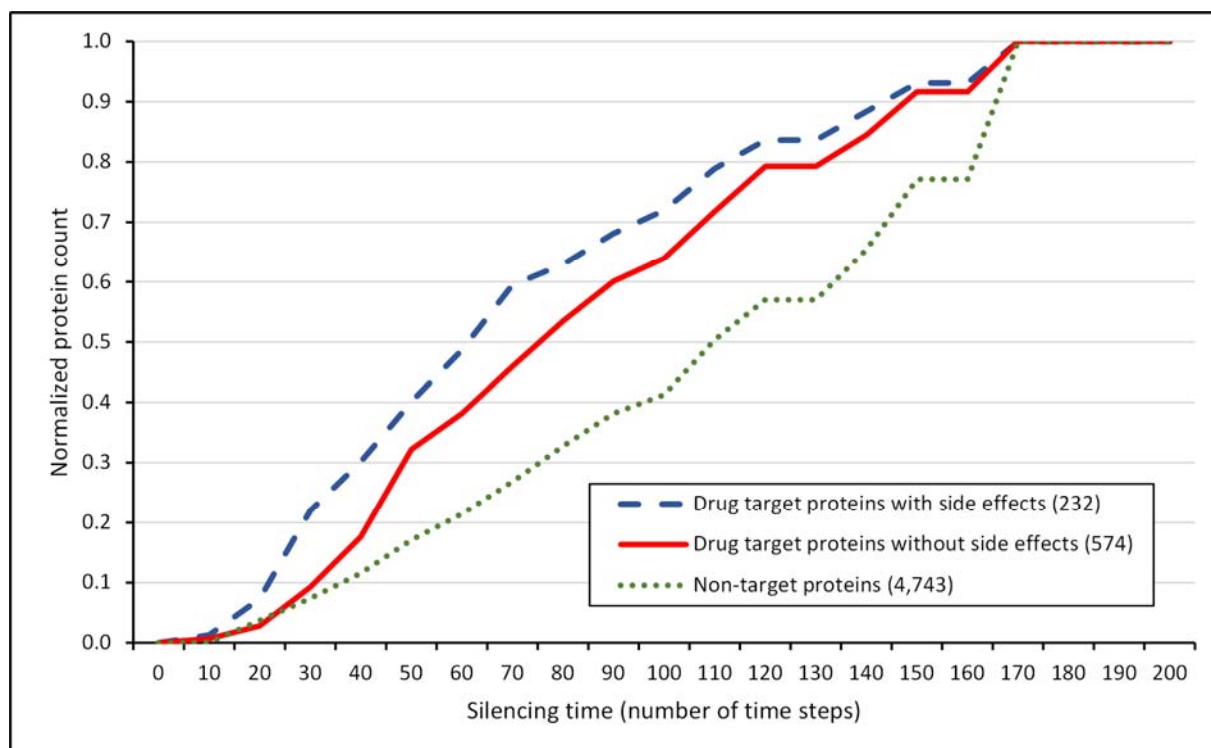

**Figure 4 | Cumulative silencing time distribution of drug target proteins and non-target proteins with a starting energy of 1000 and a dissipation value of 5 using a 50% smaller interactome.** The diagram shows the cumulative distribution of the normalized number of proteins with given silencing times, which are drug targets with known side effects (blue dashed line), which are drug targets without known side effects (red solid line) and which are not drug targets (green dotted line). The number of proteins was normalized by dividing the number of proteins in each silencing time range by the total number of proteins allowing a better comparison. The total number of drug targets with and without side effects, and non-target proteins was 495, 1,231 and 10,713, respectively. The human interactome containing 12,439 proteins and 174,666 edges was built from the STRING database<sup>1</sup>, 1,726 human drug targets were obtained from the DrugBank database<sup>2</sup> and 99,423 drug-side effect pairs were taken from the SIDER database<sup>3</sup>. 50% of the original interactome proteins were deleted randomly. The giant component of the remaining interactome contained 5,549 proteins (45%), 806 drug target proteins total (47%) and 232 drug targets with known side effects (47%). Silencing times were calculated separately for every protein with the Turbine program<sup>4</sup> as described in the Methods section of the main text with a starting energy of 1,000 and a dissipation value of 5 units. Statistical analysis was performed using the Mann-Whitney (Wilcoxon rank sum) test function of the R package<sup>5</sup>. There was a statistically significant difference ( $p=3.368e-4$ ) between the silencing times of drug targets with known side effects and the silencing times of drug targets without known side effects. The difference between the silencing times of drug targets and non-target proteins was also statistically significant ( $p=2.2e-16$ ).

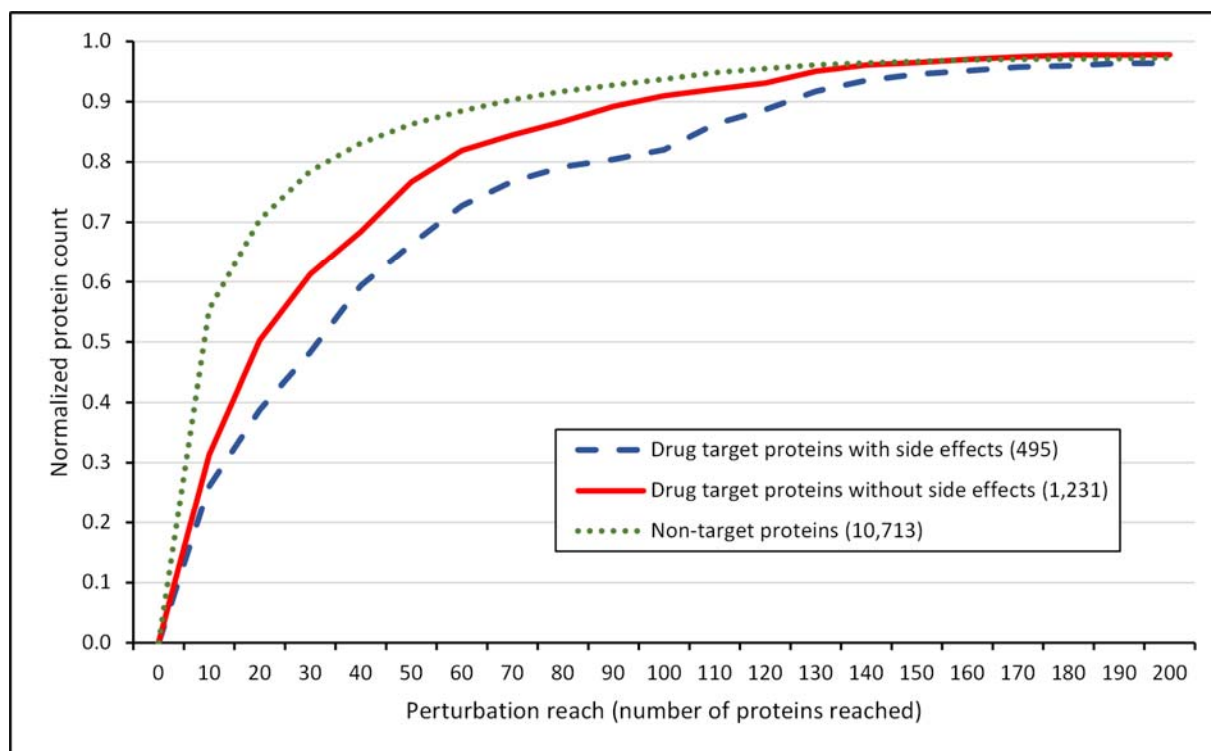

**Figure 5 | Cumulative perturbation reach distribution of drug targets and non-target proteins with a starting energy of 10,000 and a dissipation value of 5.** The diagram shows the cumulative distribution of the normalized number of proteins with given perturbation reach values, which are drug targets with known side effects (blue dashed line), which are drug targets without known side effects (red solid line) and which are not drug targets (green dotted line). The number of proteins was normalized by dividing the number of proteins in each perturbation reach range by the total number of proteins allowing a better comparison. The total number of drug targets with and without side effects, and non-target proteins was 495, 1,231 and 10,713, respectively. The figure shows 97.25% of all proteins (having a perturbation reach below 200 proteins reached). The human interactome containing 12,439 proteins and 174,666 edges was built from the STRING database<sup>1</sup>, 1,726 human drug targets were obtained from the DrugBank database<sup>2</sup> and 99,423 drug-side effect pairs were taken from the SIDER database<sup>3</sup>. Perturbation reach values were calculated separately for every protein with the Turbine program<sup>4</sup> as described in the Methods section of the main text with a starting energy of 10,000 and a dissipation value of 5 units. Statistical analysis was performed using the Mann-Whitney (Wilcoxon rank sum) test function of the R package<sup>5</sup>. There was a statistically significant difference ( $p=1.663e-5$ ) between the perturbation reach values of drug targets with known side effects and the perturbation reach values of drug targets without known side effects. The difference between the perturbation reach values of drug targets and non-target proteins was also statistically significant ( $p=2.2e-16$ ).

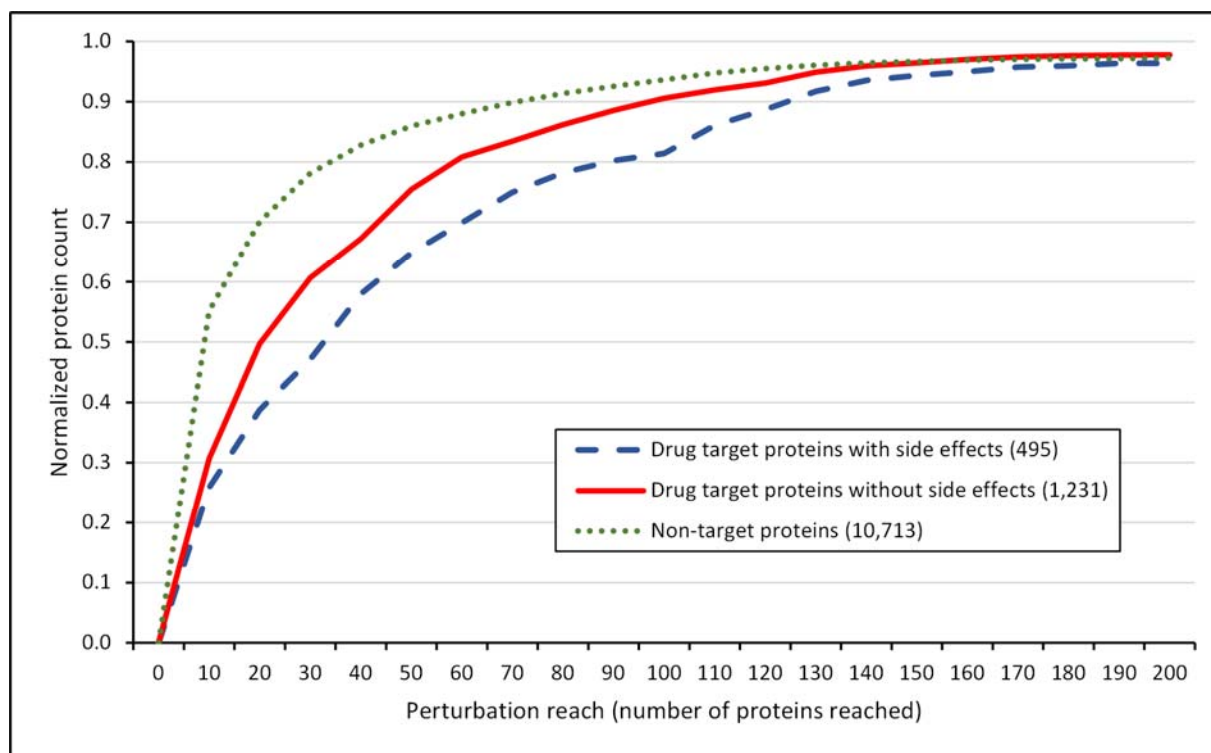

**Figure 6 | Cumulative perturbation reach distribution of drug targets and non-target proteins with a starting energy of 10,000 and a dissipation value of 1.** The diagram shows the cumulative distribution of the normalized number of proteins with given perturbation reach values, which are drug targets with known side effects (blue dashed line), which are drug targets without known side effects (red solid line) and which are not drug targets (green dotted line). The number of proteins was normalized by dividing the number of proteins in each perturbation reach range by the total number of proteins allowing a better comparison. The total number of drug targets with and without side effects, and non-target proteins was 495, 1,231 and 10,713, respectively. The figure shows 97.25% of all proteins (having a perturbation reach below 200 proteins reached). The human interactome containing 12,439 proteins and 174,666 edges was built from the STRING database<sup>1</sup>, 1,726 human drug targets were obtained from the DrugBank database<sup>2</sup> and 99,423 drug-side effect pairs were taken from the SIDER database<sup>3</sup>. Perturbation reach values were calculated separately for every protein with the Turbine program<sup>4</sup> as described in the Methods section of the main text with a starting energy of 10,000 and a dissipation value of 1 unit. Statistical analysis was performed using the Mann-Whitney (Wilcoxon rank sum) test function of the R package<sup>5</sup>. There was a statistically significant difference ( $p=1.49e-5$ ) between the perturbation reach values of drug targets with known side effects and the perturbation reach values of drug targets without known side effects. The difference between the perturbation reach values of drug targets and non-target proteins was also statistically significant ( $p=2.2e-16$ ).



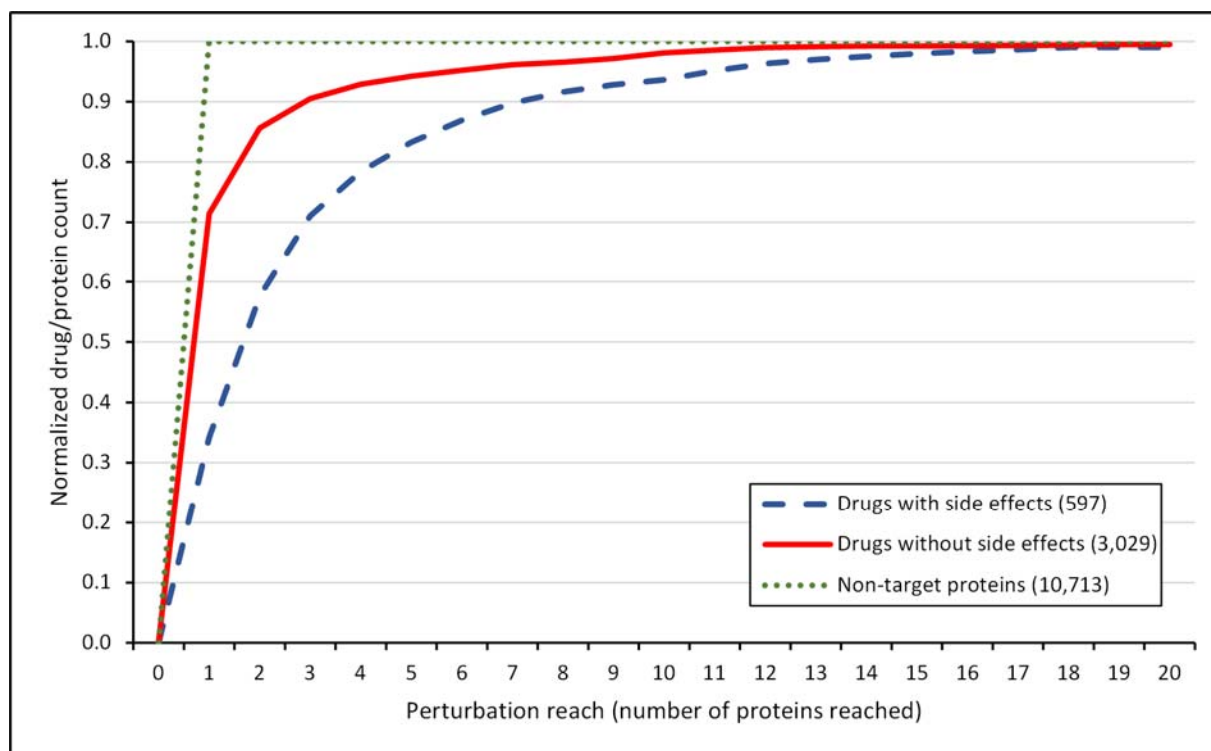

**Figure 7 | Cumulative perturbation reach distribution of drugs and non-target proteins with starting energy of 10,000 and a dissipation value of 1 with distributed starting energy among multiple targets.** The diagram shows the cumulative perturbation reach distribution of the normalized number of drugs with known side effects (blue dashed line), drugs without known side effects (red solid line) and non-target proteins (green dotted line). The number of proteins/drugs was normalized by dividing the number of proteins/drugs in each perturbation reach range by the total number of proteins/drugs allowing a better comparison. The total number of drugs with and without side effects, and non-target proteins was 597, 3,029 and 10,713, respectively. The figure shows 99.58% of all proteins/drugs (having a perturbation reach below 400 proteins reached). The human interactome containing 12,439 proteins and 174,666 edges was built from the STRING database<sup>1</sup>, 3,626 human drugs were obtained from the DrugBank database<sup>2</sup> and 99,423 drug-side effect pairs were taken from the SIDER database<sup>3</sup>. Perturbation reach values were calculated separately for every protein/drug with the Turbine program<sup>4</sup> as described in the Methods section of the main text with a starting energy of 10,000 and a dissipation value of 1 unit. In case of drugs with multiple targets, the starting energy was distributed evenly among the drug targets. Statistical analysis was performed using the Mann-Whitney (Wilcoxon) test function of the R package<sup>5</sup>. There was a statistically significant difference ( $p=6.176e-8$ ) between the perturbation reach values of drugs with known side effects and the perturbation reach values of drugs without known side effects. The difference between the perturbation reach values of drugs and non-target proteins was also statistically significant ( $p=2.2e-16$ ).

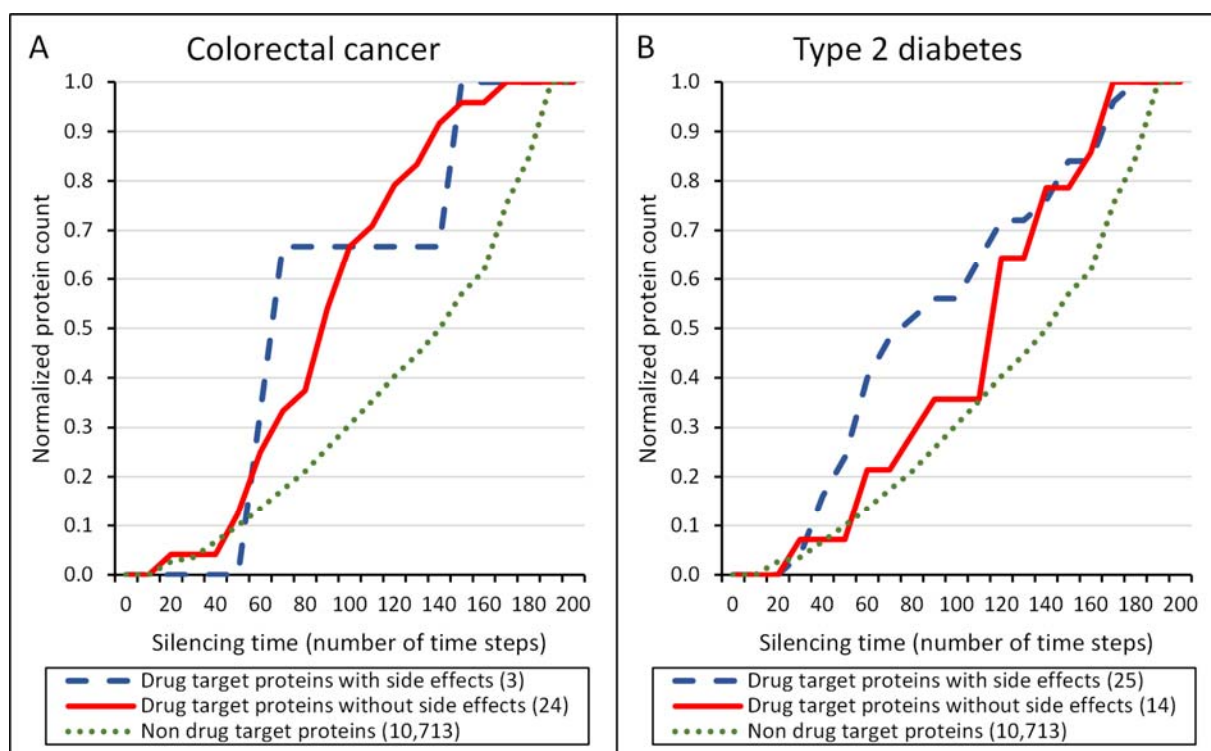

**Figure 8 | Cumulative silencing time distribution of targets of drugs used in the treatment of colorectal cancer and type 2 diabetes mellitus.** The diagram shows the cumulative distribution of the normalized number of proteins with given silencing times, which are drug targets used in the treatment of the disease with known side effects (blue dashed line), which are drug targets used in the treatment of the disease without known side effects (red solid line) and which are not drug targets (green dotted line); for colorectal cancer (Panel A) and type 2 diabetes (Panel B). The number of proteins was normalized by dividing the number of proteins in each silencing time range by the total number of proteins allowing a better comparison. The total number of drug targets used in the treatment of colorectal cancer with and without side effects was 3 and 24, respectively, while for type 2 diabetes the total number of drug targets was 25 and 14, respectively. The human interactome containing 12,439 proteins and 174,666 edges was built from the STRING database<sup>1</sup>, 1,726 human drug targets were obtained from the DrugBank database<sup>2</sup> and 99,423 drug-side effect pairs were taken from the SIDER database<sup>3</sup>. Silencing times were calculated separately for every protein with the Turbine program<sup>4</sup> as described in the Methods section of the main text with a starting energy of 1,000 and a dissipation value of 5 units. Statistical analysis was performed using the Mann-Whitney-Wilcoxon test of the R package<sup>5</sup>. No statistically significant difference could be shown between silencing times of targets with known side effects and silencing times of targets without known side effects of drugs used in the treatment of colorectal cancer ( $p=1$ ) and type 2 diabetes ( $p=0.2593$ ). However, the difference between the silencing times of drug targets and non-target proteins was statistically significant for drug targets used in the treatment of both colorectal cancer ( $p=3.367e-5$ ) and type 2 diabetes ( $p=5.88e-5$ ).

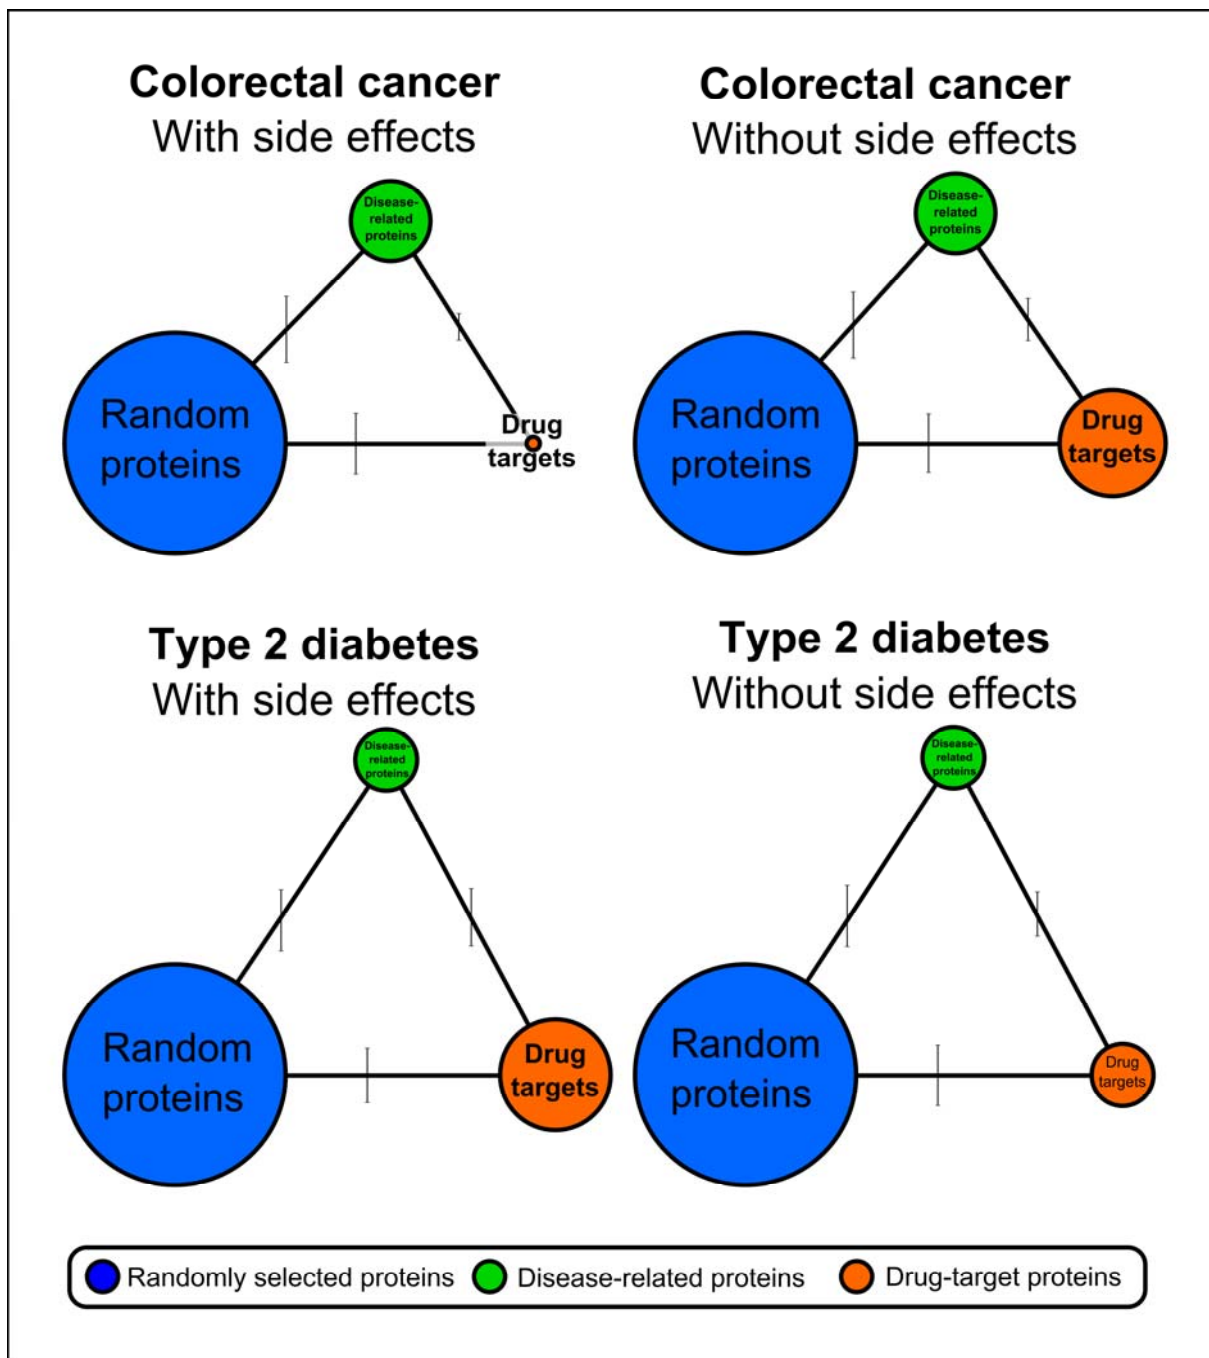

**Figure 9 | Human interactome distance between drug targets used in the treatment of colorectal cancer and type 2 diabetes, between proteins related to these diseases and randomly selected proteins.** The figure shows the average human interactome distances between the following proteins: drug targets used in the treatment of colorectal cancer and type 2 diabetes with and without side effects (orange circles), proteins related to these diseases (green circles) and randomly selected proteins (blue circles). The sides of the triangles (the distance between the centres of the circles) are proportional to the average number of human interactome

edges between the respective protein groups, while the vertical lines associated with the sides of the triangles correspond to the standard deviation (SD). The average distance between randomly selected proteins and disease-related proteins was 2.82 edges (SD: 0.601) for colorectal cancer and 3.43 edges (SD: 0.557) for type 2 diabetes; between randomly selected proteins and drug targets with side effects was 3.24 edges (SD: 0.551) for colorectal cancer and 3.44 edges (SD: 0.490) for type 2 diabetes; between randomly selected proteins and drug targets without side effects was 3.32 edges (SD: 0.533) for colorectal cancer and 3.41 edges (SD: 0.545) for type 2 diabetes; between disease-related proteins and drug targets with side effects was 2.39 edges (SD: 0.242) for colorectal cancer and 3.23 edges (SD: 0.522) for type 2 diabetes; between disease-related proteins and drug targets without side effects was 2.53 edges (SD: 0.388) for colorectal cancer and 3.25 edges (SD: 0.402) for type 2 diabetes. Sizes of the circles are proportional to the number of proteins contained in each group. There were 50 randomly selected proteins; 18 colorectal cancer-related and 14 type 2 diabetes-related proteins; 3 drug targets with and 24 drug targets without side effects used in the treatment of colorectal cancer; 25 drug targets with and 14 drug targets without side effects used in the treatment of type 2 diabetes. The human interactome containing 12,439 proteins and 174,666 edges was built from the STRING database<sup>1</sup>, 1,726 human drug targets were obtained from the DrugBank database<sup>2</sup> and 99,423 drug-side effect pairs were taken from the SIDER database<sup>3</sup>. Network distances were calculated as shortest paths using the Pajek programme<sup>6</sup> as described in the Methods section of the main text and are detailed in Tables 10-13. The figure was created using Inkscape<sup>7</sup>.

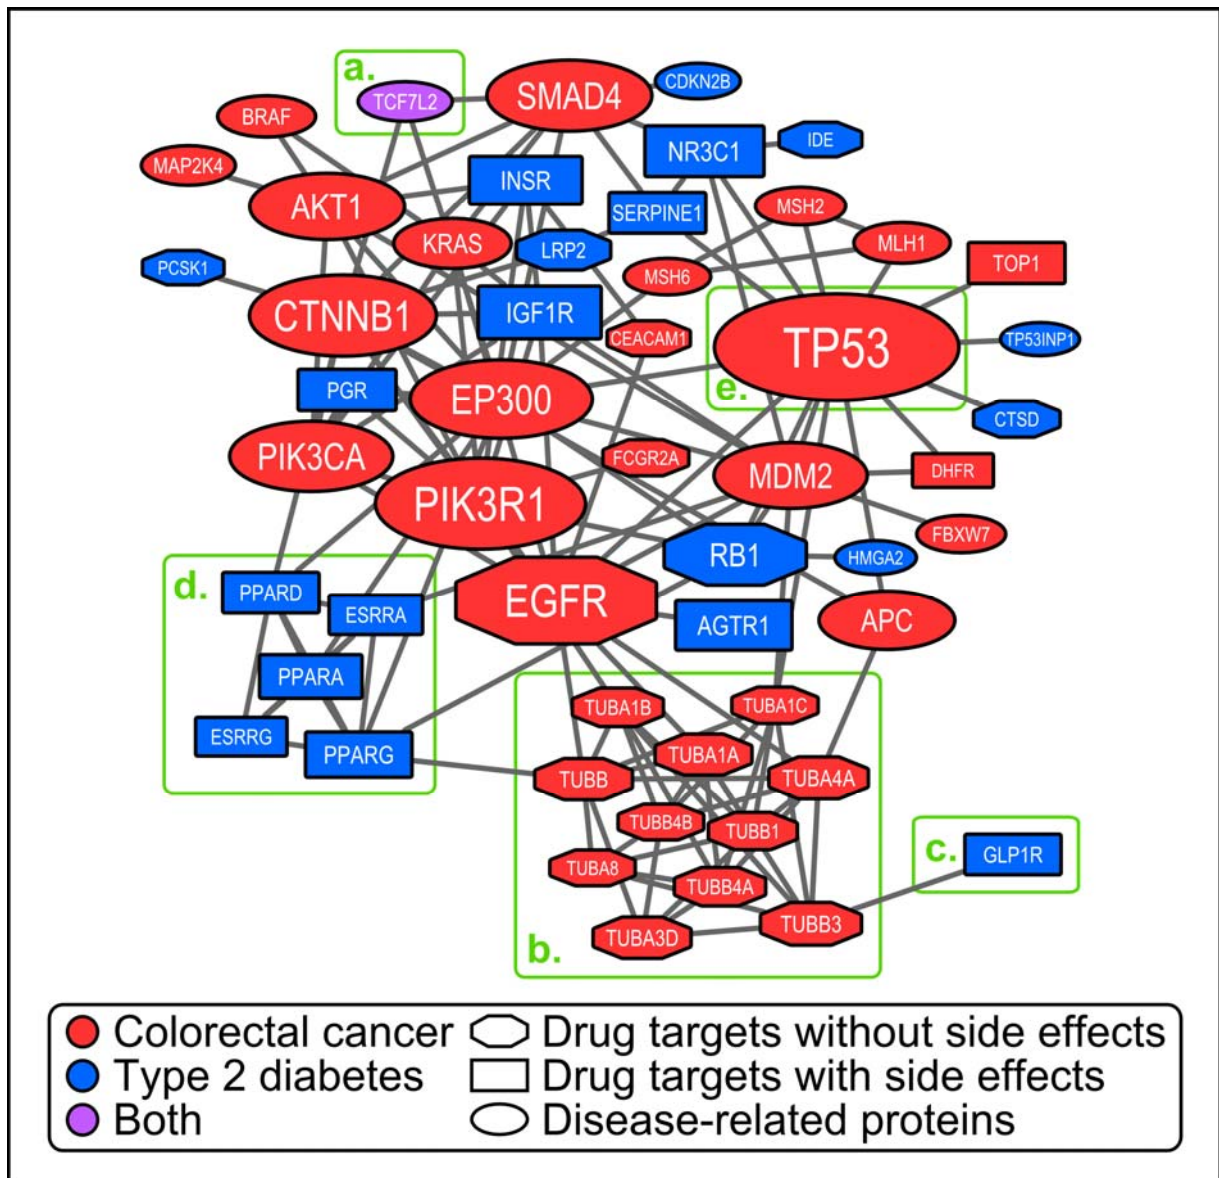

**Figure 10 | Human protein-protein interaction network of the proteins related to colorectal cancer and type 2 diabetes and the drug targets used in the treatment of these diseases.** The figure shows the giant component of the human protein-protein interaction network containing the proteins related to colorectal cancer and type 2 diabetes mellitus and the drug targets used in the treatment of these diseases. Red nodes represent proteins or drug targets related to colorectal cancer, blue nodes represent those related to type 2 diabetes, while purple nodes represent those related to both. Ellipses, octagons and squares represent proteins related to diseases, drug targets without known side effects and drug targets with known side effects, respectively. Node highlighted by green box (a.) is the TCF7L2 protein related to both diseases, which is the transcription factor 7-like 2 participating in the Wnt signalling pathway and modulating MYC expression. The highly interconnected node cluster highlighted by green box (b.) contains 11 drug targets without known side effects used in the treatment of colorectal cancer, which are all

tubuline chain proteins. Node highlighted by green box (c.) representing protein GLP1R, the glucagon-like peptide 1 receptor, is connected only to node TUBB3 of the tubuline cluster (b.). The highly interconnected node cluster highlighted by green box (d.) contains 5 drug targets with known side effects used in the treatment of type 2 diabetes which are the peroxisome proliferator-activated receptors alpha (PPARA), gamma (PPARG) and delta (PPARD) and the estrogen-related receptors alpha (ESRRA) and gamma (ESSRG). The network hub highlighted by green box (e.) is TP53, the cellular tumour antigen p53. Node sizes are proportional to the degrees of the respective proteins in the full human protein-protein interaction network. All proteins here are referenced by their UniProt ID<sup>9</sup>. The human interactome containing 12,439 proteins and 174,666 edges was built from the STRING database<sup>1</sup>, 1,726 human drug targets were obtained from the DrugBank database<sup>2</sup> and 99,423 drug-side effect pairs were taken from the SIDER database<sup>3</sup>. Node degrees were calculated with the Pajek programme<sup>6</sup> as described in the Methods section of the main text. The figure was created using Cytoscape<sup>8</sup> and Inkscape<sup>7</sup>.

## Supplementary Tables

**Table 1 | Drugs obtained from the DrugBank database, which have known side effects in the SIDER database**

| <b>DBID</b>    | <b>Drug Name</b> | <b>DBID</b>    | <b>Drug Name</b>     | <b>DBID</b>    | <b>Drug Name</b>    |
|----------------|------------------|----------------|----------------------|----------------|---------------------|
| <i>DB00001</i> | Lepirudin        | <i>DB00210</i> | Adapalene            | <i>DB00289</i> | Atomoxetine         |
| <i>DB00006</i> | Bivalirudin      | <i>DB00211</i> | Midodrine            | <i>DB00292</i> | Etomidate           |
| <i>DB00046</i> | Insulin Lispro   | <i>DB00213</i> | Pantoprazole         | <i>DB00293</i> | Raltitrexed         |
| <i>DB00047</i> | Insulin Glargine | <i>DB00214</i> | Torasemide           | <i>DB00295</i> | Morphine            |
| <i>DB00050</i> | Cetorelix        | <i>DB00215</i> | Citalopram           | <i>DB00296</i> | Ropivacaine         |
| <i>DB00063</i> | Eptifibatide     | <i>DB00216</i> | Eletriptan           | <i>DB00297</i> | Bupivacaine         |
| <i>DB00106</i> | Abarelix         | <i>DB00218</i> | Moxifloxacin         | <i>DB00302</i> | Tranexamic Acid     |
| <i>DB00115</i> | Cyanocobalamin   | <i>DB00222</i> | Glimepiride          | <i>DB00307</i> | Bexarotene          |
| <i>DB00125</i> | L-Arginine       | <i>DB00227</i> | Lovastatin           | <i>DB00308</i> | Ibutilide           |
| <i>DB00152</i> | Thiamine         | <i>DB00228</i> | Enflurane            | <i>DB00310</i> | Chlorthalidone      |
| <i>DB00162</i> | Vitamin A        | <i>DB00231</i> | Temazepam            | <i>DB00312</i> | Pentobarbital       |
| <i>DB00175</i> | Pravastatin      | <i>DB00240</i> | Alclometasone        | <i>DB00313</i> | Valproic Acid       |
| <i>DB00176</i> | Fluvoxamine      | <i>DB00242</i> | Cladribine           | <i>DB00315</i> | Zolmitriptan        |
| <i>DB00177</i> | Valsartan        | <i>DB00243</i> | Ranolazine           | <i>DB00316</i> | Acetaminophen       |
| <i>DB00178</i> | Ramipril         | <i>DB00246</i> | Ziprasidone          | <i>DB00317</i> | Gefitinib           |
| <i>DB00180</i> | Flunisolide      | <i>DB00247</i> | Methysergide         | <i>DB00318</i> | Codeine             |
| <i>DB00182</i> | Amphetamine      | <i>DB00248</i> | Cabergoline          | <i>DB00320</i> | Dihydroergotamine   |
| <i>DB00184</i> | Nicotine         | <i>DB00252</i> | Phenytoin            | <i>DB00321</i> | Amitriptyline       |
| <i>DB00185</i> | Cevimeline       | <i>DB00253</i> | Medrysone            | <i>DB00323</i> | Tolcapone           |
| <i>DB00186</i> | Lorazepam        | <i>DB00257</i> | Clotrimazole         | <i>DB00324</i> | Fluorometholone     |
| <i>DB00187</i> | Esmolol          | <i>DB00264</i> | Metoprolol           | <i>DB00327</i> | Hydromorphone       |
| <i>DB00188</i> | Bortezomib       | <i>DB00268</i> | Ropinirole           | <i>DB00328</i> | Indomethacin        |
| <i>DB00191</i> | Phentermine      | <i>DB00273</i> | Topiramate           | <i>DB00331</i> | Metformin           |
| <i>DB00193</i> | Tramadol         | <i>DB00276</i> | Amsacrine            | <i>DB00332</i> | Ipratropium bromide |
| <i>DB00195</i> | Betaxolol        | <i>DB00277</i> | Theophylline         | <i>DB00333</i> | Methadone           |
| <i>DB00197</i> | Troglitazone     | <i>DB00278</i> | Argatroban           | <i>DB00334</i> | Olanzapine          |
| <i>DB00198</i> | Oseltamivir      | <i>DB00280</i> | Disopyramide         | <i>DB00335</i> | Atenolol            |
| <i>DB00200</i> | Hydroxocobalamin | <i>DB00281</i> | Lidocaine            | <i>DB00337</i> | Pimecrolimus        |
| <i>DB00201</i> | Caffeine         | <i>DB00282</i> | Pamidronate          | <i>DB00338</i> | Omeprazole          |
| <i>DB00202</i> | Succinylcholine  | <i>DB00284</i> | Acarbose             | <i>DB00343</i> | Diltiazem           |
| <i>DB00204</i> | Dofetilide       | <i>DB00285</i> | Venlafaxine          | <i>DB00344</i> | Protriptyline       |
| <i>DB00205</i> | Pyrimethamine    | <i>DB00286</i> | Conjugated Estrogens | <i>DB00346</i> | Alfuzosin           |
| <i>DB00206</i> | Reserpine        | <i>DB00287</i> | Travoprost           | <i>DB00349</i> | Clobazam            |
| <i>DB00208</i> | Ticlopidine      | <i>DB00288</i> | Amcinonide           | <i>DB00350</i> | Minoxidil           |

| <b>DBID</b>    | <b>Drug Name</b>    | <b>DBID</b>    | <b>Drug Name</b>  | <b>DBID</b>    | <b>Drug Name</b>       |
|----------------|---------------------|----------------|-------------------|----------------|------------------------|
| <i>DB00351</i> | Megestrol           | <i>DB00431</i> | Lindane           | <i>DB00500</i> | Tolmetin               |
| <i>DB00356</i> | Chlorzoxazone       | <i>DB00433</i> | Prochlorperazine  | <i>DB00501</i> | Cimetidine             |
| <i>DB00357</i> | Aminoglutethimide   | <i>DB00434</i> | Cyproheptadine    | <i>DB00502</i> | Haloperidol            |
| <i>DB00358</i> | Mefloquine          | <i>DB00437</i> | Allopurinol       | <i>DB00518</i> | Albendazole            |
| <i>DB00360</i> | Tetrahydrobiopterin | <i>DB00439</i> | Cerivastatin      | <i>DB00519</i> | Trandolapril           |
| <i>DB00361</i> | Vinorelbine         | <i>DB00440</i> | Trimethoprim      | <i>DB00521</i> | Carteolol              |
| <i>DB00363</i> | Clozapine           | <i>DB00441</i> | Gemcitabine       | <i>DB00530</i> | Erlotinib              |
| <i>DB00364</i> | Sucralfate          | <i>DB00444</i> | Teniposide        | <i>DB00532</i> | Mephenytoin            |
| <i>DB00367</i> | Levonorgestrel      | <i>DB00446</i> | Chloramphenicol   | <i>DB00533</i> | Rofecoxib              |
| <i>DB00368</i> | Norepinephrine      | <i>DB00448</i> | Lansoprazole      | <i>DB00535</i> | Cefdinir               |
| <i>DB00370</i> | Mirtazapine         | <i>DB00449</i> | Dipivefrin        | <i>DB00537</i> | Ciprofloxacin          |
| <i>DB00371</i> | Meprobamate         | <i>DB00450</i> | Droperidol        | <i>DB00539</i> | Toremifene             |
| <i>DB00373</i> | Timolol             | <i>DB00454</i> | Meperidine        | <i>DB00540</i> | Nortriptyline          |
| <i>DB00374</i> | Treprostinil        | <i>DB00457</i> | Prazosin          | <i>DB00541</i> | Vincristine            |
| <i>DB00376</i> | Trihexyphenidyl     | <i>DB00458</i> | Imipramine        | <i>DB00542</i> | Benazepril             |
| <i>DB00377</i> | Palonosetron        | <i>DB00459</i> | Acitretin         | <i>DB00543</i> | Amoxapine              |
| <i>DB00379</i> | Mexiletine          | <i>DB00461</i> | Nabumetone        | <i>DB00545</i> | Pyridostigmine         |
| <i>DB00380</i> | Dexrazoxane         | <i>DB00462</i> | Methylscopolamine | <i>DB00547</i> | Desoximetasone         |
| <i>DB00381</i> | Amlodipine          | <i>DB00465</i> | Ketorolac         | <i>DB00548</i> | Azelaic Acid           |
| <i>DB00382</i> | Tacrine             | <i>DB00471</i> | Montelukast       | <i>DB00549</i> | Zafirlukast            |
| <i>DB00384</i> | Triamterene         | <i>DB00472</i> | Fluoxetine        | <i>DB00550</i> | Propylthiouracil       |
| <i>DB00388</i> | Phenylephrine       | <i>DB00474</i> | Methohexital      | <i>DB00554</i> | Piroxicam              |
| <i>DB00390</i> | Digoxin             | <i>DB00475</i> | Chlordiazepoxide  | <i>DB00555</i> | Lamotrigine            |
| <i>DB00393</i> | Nimodipine          | <i>DB00476</i> | Duloxetine        | <i>DB00558</i> | Zanamivir              |
| <i>DB00396</i> | Progesterone        | <i>DB00477</i> | Chlorpromazine    | <i>DB00559</i> | Bosentan               |
| <i>DB00398</i> | Sorafenib           | <i>DB00480</i> | Lenalidomide      | <i>DB00561</i> | Doxapram               |
| <i>DB00401</i> | Nisoldipine         | <i>DB00481</i> | Raloxifene        | <i>DB00563</i> | Methotrexate           |
| <i>DB00404</i> | Alprazolam          | <i>DB00482</i> | Celecoxib         | <i>DB00564</i> | Carbamazepine          |
| <i>DB00408</i> | Loxapine            | <i>DB00484</i> | Brimonidine       | <i>DB00571</i> | Propranolol            |
| <i>DB00411</i> | Carbachol           | <i>DB00486</i> | Nabilone          | <i>DB00572</i> | Atropine               |
| <i>DB00412</i> | Rosiglitazone       | <i>DB00489</i> | Sotalol           | <i>DB00573</i> | Fenoprofen             |
| <i>DB00413</i> | Pramipexole         | <i>DB00490</i> | Buspirone         | <i>DB00575</i> | Clonidine              |
| <i>DB00418</i> | Secobarbital        | <i>DB00491</i> | Miglitol          | <i>DB00580</i> | Valdecoxib             |
| <i>DB00419</i> | Miglustat           | <i>DB00492</i> | Fosinopril        | <i>DB00585</i> | Nizatidine             |
| <i>DB00421</i> | Spirolactone        | <i>DB00494</i> | Entacapone        | <i>DB00586</i> | Diclofenac             |
| <i>DB00422</i> | Methylphenidate     | <i>DB00496</i> | Darifenacin       | <i>DB00590</i> | Doxazosin              |
| <i>DB00423</i> | Methocarbamol       | <i>DB00497</i> | Oxycodone         | <i>DB00591</i> | Fluocinolone Acetonide |
| <i>DB00425</i> | Zolpidem            | <i>DB00499</i> | Flutamide         | <i>DB00593</i> | Ethosuximide           |



| <b>DBID</b>    | <b>Drug Name</b>    | <b>DBID</b>    | <b>Drug Name</b> | <b>DBID</b>    | <b>Drug Name</b>   |
|----------------|---------------------|----------------|------------------|----------------|--------------------|
| <i>DB00594</i> | Amiloride           | <i>DB00679</i> | Thioridazine     | <i>DB00757</i> | Dolasetron         |
| <i>DB00598</i> | Labetalol           | <i>DB00680</i> | Moricizine       | <i>DB00758</i> | Clopidogrel        |
| <i>DB00602</i> | Ivermectin          | <i>DB00683</i> | Midazolam        | <i>DB00762</i> | Irinotecan         |
| <i>DB00603</i> | Medroxyprogesterone | <i>DB00685</i> | Trovafloxacin    | <i>DB00763</i> | Methimazole        |
| <i>DB00605</i> | Sulindac            | <i>DB00687</i> | Fludrocortisone  | <i>DB00764</i> | Mometasone         |
| <i>DB00608</i> | Chloroquine         | <i>DB00690</i> | Flurazepam       | <i>DB00768</i> | Olopatadine        |
| <i>DB00611</i> | Butorphanol         | <i>DB00691</i> | Moexipril        | <i>DB00772</i> | Malathion          |
| <i>DB00612</i> | Bisoprolol          | <i>DB00692</i> | Phentolamine     | <i>DB00773</i> | Etoposide          |
| <i>DB00615</i> | Rifabutin           | <i>DB00694</i> | Daunorubicin     | <i>DB00774</i> | Hydroflumethiazide |
| <i>DB00619</i> | Imatinib            | <i>DB00695</i> | Furosemide       | <i>DB00775</i> | Tirofiban          |
| <i>DB00620</i> | Triamcinolone       | <i>DB00696</i> | Ergotamine       | <i>DB00776</i> | Oxcarbazepine      |
| <i>DB00621</i> | Oxandrolone         | <i>DB00697</i> | Tizanidine       | <i>DB00780</i> | Phenelzine         |
| <i>DB00622</i> | Nicardipine         | <i>DB00700</i> | Eplerenone       | <i>DB00782</i> | Proprantheline     |
| <i>DB00623</i> | Fluphenazine        | <i>DB00703</i> | Methazolamide    | <i>DB00783</i> | Estradiol          |
| <i>DB00624</i> | Testosterone        | <i>DB00704</i> | Naltrexone       | <i>DB00784</i> | Mefenamic acid     |
| <i>DB00630</i> | Alendronate         | <i>DB00706</i> | Tamsulosin       | <i>DB00788</i> | Naproxen           |
| <i>DB00631</i> | Clofarabine         | <i>DB00708</i> | Sufentanil       | <i>DB00790</i> | Perindopril        |
| <i>DB00633</i> | Dexmedetomidine     | <i>DB00710</i> | Ibandronate      | <i>DB00794</i> | Primidone          |
| <i>DB00635</i> | Prednisone          | <i>DB00712</i> | Flurbiprofen     | <i>DB00795</i> | Sulfasalazine      |
| <i>DB00640</i> | Adenosine           | <i>DB00714</i> | Apomorphine      | <i>DB00796</i> | Candesartan        |
| <i>DB00641</i> | Simvastatin         | <i>DB00715</i> | Paroxetine       | <i>DB00798</i> | Gentamicin         |
| <i>DB00642</i> | Pemetrexed          | <i>DB00720</i> | Clodronate       | <i>DB00799</i> | Tazarotene         |
| <i>DB00647</i> | Propoxyphene        | <i>DB00721</i> | Procaine         | <i>DB00800</i> | Fenoldopam         |
| <i>DB00650</i> | Leucovorin          | <i>DB00724</i> | Imiquimod        | <i>DB00802</i> | Alfentanil         |
| <i>DB00651</i> | Dyphylline          | <i>DB00727</i> | Nitroglycerin    | <i>DB00804</i> | Dicyclomine        |
| <i>DB00652</i> | Pentazocine         | <i>DB00728</i> | Rocuronium       | <i>DB00806</i> | Pentoxifylline     |
| <i>DB00654</i> | Latanoprost         | <i>DB00731</i> | Nateglinide      | <i>DB00807</i> | Proparacaine       |
| <i>DB00656</i> | Trazodone           | <i>DB00733</i> | Pralidoxime      | <i>DB00808</i> | Indapamide         |
| <i>DB00659</i> | Acamprosate         | <i>DB00734</i> | Risperidone      | <i>DB00809</i> | Tropicamide        |
| <i>DB00661</i> | Verapamil           | <i>DB00735</i> | Naftifine        | <i>DB00810</i> | Biperiden          |
| <i>DB00665</i> | Nilutamide          | <i>DB00740</i> | Riluzole         | <i>DB00811</i> | Ribavirin          |
| <i>DB00668</i> | Epinephrine         | <i>DB00745</i> | Modafinil        | <i>DB00813</i> | Fentanyl           |
| <i>DB00669</i> | Sumatriptan         | <i>DB00747</i> | Scopolamine      | <i>DB00814</i> | Meloxicam          |
| <i>DB00672</i> | Chlorpropamide      | <i>DB00749</i> | Etodolac         | <i>DB00818</i> | Propofol           |
| <i>DB00673</i> | Aprepitant          | <i>DB00750</i> | Prilocaine       | <i>DB00819</i> | Acetazolamide      |
| <i>DB00674</i> | Galantamine         | <i>DB00751</i> | Epinastine       | <i>DB00822</i> | Disulfiram         |
| <i>DB00675</i> | Tamoxifen           | <i>DB00753</i> | Isoflurane       | <i>DB00829</i> | Diazepam           |
| <i>DB00678</i> | Losartan            | <i>DB00754</i> | Ethotoin         | <i>DB00831</i> | Trifluoperazine    |

| <b>DBID</b>    | <b>Drug Name</b>     | <b>DBID</b>    | <b>Drug Name</b>   | <b>DBID</b>    | <b>Drug Name</b>       |
|----------------|----------------------|----------------|--------------------|----------------|------------------------|
| <i>DB00834</i> | Mifepristone         | <i>DB00908</i> | Quinidine          | <i>DB00991</i> | Oxaprozin              |
| <i>DB00835</i> | Brompheniramine      | <i>DB00909</i> | Zonisamide         | <i>DB00992</i> | Methyl aminolevulinate |
| <i>DB00836</i> | Loperamide           | <i>DB00910</i> | Paricalcitol       | <i>DB00993</i> | Azathioprine           |
| <i>DB00838</i> | Clocortolone         | <i>DB00912</i> | Repaglinide        | <i>DB00996</i> | Gabapentin             |
| <i>DB00839</i> | Tolazamide           | <i>DB00915</i> | Amantadine         | <i>DB00997</i> | Doxorubicin            |
| <i>DB00841</i> | Dobutamine           | <i>DB00918</i> | Almotriptan        | <i>DB00998</i> | Frovatriptan           |
| <i>DB00842</i> | Oxazepam             | <i>DB00920</i> | Ketotifen          | <i>DB00999</i> | Hydrochlorothiazide    |
| <i>DB00843</i> | Donepezil            | <i>DB00921</i> | Buprenorphine      | <i>DB01001</i> | Salbutamol             |
| <i>DB00844</i> | Nalbuphine           | <i>DB00924</i> | Cyclobenzaprine    | <i>DB01005</i> | Hydroxyurea            |
| <i>DB00850</i> | Perphenazine         | <i>DB00925</i> | Phenoxybenzamine   | <i>DB01006</i> | Letrozole              |
| <i>DB00851</i> | Dacarbazine          | <i>DB00927</i> | Famotidine         | <i>DB01009</i> | Ketoprofen             |
| <i>DB00857</i> | Terbinafine          | <i>DB00929</i> | Misoprostol        | <i>DB01012</i> | Cinacalcet             |
| <i>DB00860</i> | Prednisolone         | <i>DB00933</i> | Mesoridazine       | <i>DB01013</i> | Clobetasol             |
| <i>DB00861</i> | Diflunisal           | <i>DB00937</i> | Diethylpropion     | <i>DB01014</i> | Balsalazide            |
| <i>DB00863</i> | Ranitidine           | <i>DB00938</i> | Salmeterol         | <i>DB01017</i> | Minocycline            |
| <i>DB00864</i> | Tacrolimus           | <i>DB00949</i> | Felbamate          | <i>DB01018</i> | Guanfacine             |
| <i>DB00868</i> | Benzonatate          | <i>DB00952</i> | Naratriptan        | <i>DB01019</i> | Bethanechol            |
| <i>DB00869</i> | Dorzolamide          | <i>DB00953</i> | Rizatriptan        | <i>DB01023</i> | Felodipine             |
| <i>DB00870</i> | Suprofen             | <i>DB00959</i> | Methylprednisolone | <i>DB01024</i> | Mycophenolic acid      |
| <i>DB00871</i> | Terbutaline          | <i>DB00960</i> | Pindolol           | <i>DB01029</i> | Irbesartan             |
| <i>DB00872</i> | Conivaptan           | <i>DB00961</i> | Mepivacaine        | <i>DB01030</i> | Topotecan              |
| <i>DB00873</i> | Loteprednol          | <i>DB00962</i> | Zaleplon           | <i>DB01032</i> | Probenecid             |
| <i>DB00876</i> | Eprosartan           | <i>DB00963</i> | Bromfenac          | <i>DB01035</i> | Procainamide           |
| <i>DB00881</i> | Quinapril            | <i>DB00964</i> | Apraclonidine      | <i>DB01036</i> | Tolterodine            |
| <i>DB00883</i> | Isosorbide Dinitrate | <i>DB00966</i> | Telmisartan        | <i>DB01037</i> | Selegiline             |
| <i>DB00884</i> | Risedronate          | <i>DB00968</i> | Methyldopa         | <i>DB01039</i> | Fenofibrate            |
| <i>DB00887</i> | Bumetanide           | <i>DB00969</i> | Alosetron          | <i>DB01041</i> | Thalidomide            |
| <i>DB00889</i> | Granisetron          | <i>DB00973</i> | Ezetimibe          | <i>DB01043</i> | Memantine              |
| <i>DB00896</i> | Rimexolone           | <i>DB00975</i> | Dipyridamole       | <i>DB01047</i> | Fluocinonide           |
| <i>DB00897</i> | Triazolam            | <i>DB00978</i> | Lomefloxacin       | <i>DB01050</i> | Ibuprofen              |
| <i>DB00898</i> | Ethanol              | <i>DB00979</i> | Cyclopentolate     | <i>DB01057</i> | Echothiophate          |
| <i>DB00899</i> | Remifentanyl         | <i>DB00980</i> | Ramelteon          | <i>DB01059</i> | Norfloxacin            |
| <i>DB00900</i> | Didanosine           | <i>DB00981</i> | Physostigmine      | <i>DB01062</i> | Oxybutynin             |
| <i>DB00903</i> | Ethacrynic acid      | <i>DB00983</i> | Formoterol         | <i>DB01064</i> | Isoproterenol          |
| <i>DB00904</i> | Ondansetron          | <i>DB00986</i> | Glycopyrrolate     | <i>DB01067</i> | Glipizide              |
| <i>DB00905</i> | Bimatoprost          | <i>DB00988</i> | Dopamine           | <i>DB01068</i> | Clonazepam             |
| <i>DB00906</i> | Tiagabine            | <i>DB00989</i> | Rivastigmine       | <i>DB01069</i> | Promethazine           |
| <i>DB00907</i> | Cocaine              | <i>DB00990</i> | Exemestane         | <i>DB01073</i> | Fludarabine            |

| <b>DBID</b>    | <b>Drug Name</b> | <b>DBID</b>    | <b>Drug Name</b> | <b>DBID</b>    | <b>Drug Name</b> |
|----------------|------------------|----------------|------------------|----------------|------------------|
| <i>DB01076</i> | Atorvastatin     | <i>DB01158</i> | Bretylium        | <i>DB01223</i> | Aminophylline    |
| <i>DB01079</i> | Tegaserod        | <i>DB01159</i> | Halothane        | <i>DB01224</i> | Quetiapine       |
| <i>DB01083</i> | Orlistat         | <i>DB01161</i> | Chlorprocaine    | <i>DB01226</i> | Mivacurium       |
| <i>DB01085</i> | Pilocarpine      | <i>DB01162</i> | Terazosin        | <i>DB01229</i> | Paclitaxel       |
| <i>DB01086</i> | Benzocaine       | <i>DB01165</i> | Ofloxacin        | <i>DB01233</i> | Metoclopramide   |
| <i>DB01087</i> | Primaquine       | <i>DB01167</i> | Itraconazole     | <i>DB01234</i> | Dexamethasone    |
| <i>DB01088</i> | Iloprost         | <i>DB01169</i> | Arsenic trioxide | <i>DB01236</i> | Sevoflurane      |
| <i>DB01091</i> | Butenafine       | <i>DB01173</i> | Orphenadrine     | <i>DB01238</i> | Aripiprazole     |
| <i>DB01095</i> | Fluvastatin      | <i>DB01174</i> | Phenobarbital    | <i>DB01241</i> | Gemfibrozil      |
| <i>DB01097</i> | Leflunomide      | <i>DB01177</i> | Idarubicin       | <i>DB01242</i> | Clomipramine     |
| <i>DB01098</i> | Rosuvastatin     | <i>DB01182</i> | Propafenone      | <i>DB01247</i> | Isocarboxazid    |
| <i>DB01100</i> | Pimozide         | <i>DB01183</i> | Naloxone         | <i>DB01248</i> | Docetaxel        |
| <i>DB01101</i> | Capecitabine     | <i>DB01184</i> | Domperidone      | <i>DB01250</i> | Olsalazine       |
| <i>DB01104</i> | Sertraline       | <i>DB01185</i> | Fluoxymesterone  | <i>DB01254</i> | Dasatinib        |
| <i>DB01105</i> | Sibutramine      | <i>DB01186</i> | Pergolide        | <i>DB01258</i> | Aliskiren        |
| <i>DB01106</i> | Levocabastine    | <i>DB01189</i> | Desflurane       | <i>DB01260</i> | Desonide         |
| <i>DB01109</i> | Heparin          | <i>DB01193</i> | Acebutolol       | <i>DB01261</i> | Sitagliptin      |
| <i>DB01110</i> | Miconazole       | <i>DB01194</i> | Brinzolamide     | <i>DB01267</i> | Paliperidone     |
| <i>DB01114</i> | Chlorpheniramine | <i>DB01195</i> | Flecainide       | <i>DB01268</i> | Sunitinib        |
| <i>DB01115</i> | Nifedipine       | <i>DB01196</i> | Estramustine     | <i>DB01273</i> | Varenicline      |
| <i>DB01118</i> | Amiodarone       | <i>DB01197</i> | Captopril        | <i>DB01275</i> | Hydralazine      |
| <i>DB01119</i> | Diazoxide        | <i>DB01198</i> | Zopiclone        | <i>DB01276</i> | Exenatide        |
| <i>DB01120</i> | Gliclazide       | <i>DB01200</i> | Bromocriptine    | <i>DB01278</i> | Pramlintide      |
| <i>DB01122</i> | Ambenonium       | <i>DB01202</i> | Levetiracetam    | <i>DB01280</i> | Nelarabine       |
| <i>DB01126</i> | Dutasteride      | <i>DB01203</i> | Nadolol          | <i>DB01291</i> | Pirbuterol       |
| <i>DB01128</i> | Bicalutamide     | <i>DB01204</i> | Mitoxantrone     | <i>DB01306</i> | Insulin Aspart   |
| <i>DB01129</i> | Rabeprazole      | <i>DB01205</i> | Flumazenil       | <i>DB01320</i> | Fosphenytoin     |
| <i>DB01130</i> | Prednicarbate    | <i>DB01206</i> | Lomustine        | <i>DB01327</i> | Cefazolin        |
| <i>DB01132</i> | Pioglitazone     | <i>DB01210</i> | Levobunolol      | <i>DB01337</i> | Pancuronium      |
| <i>DB01133</i> | Tiludronate      | <i>DB01214</i> | Metipranolol     | <i>DB01340</i> | Cilazapril       |
| <i>DB01136</i> | Carvedilol       | <i>DB01215</i> | Estazolam        | <i>DB01356</i> | Lithium          |
| <i>DB01142</i> | Doxepin          | <i>DB01216</i> | Finasteride      | <i>DB01364</i> | Ephedrine        |
| <i>DB01143</i> | Amifostine       | <i>DB01217</i> | Anastrozole      | <i>DB01367</i> | Rasagiline       |
| <i>DB01148</i> | Flavoxate        | <i>DB01218</i> | Halofantrine     | <i>DB01373</i> | Calcium          |
| <i>DB01149</i> | Nefazodone       | <i>DB01219</i> | Dantrolene       | <i>DB01378</i> | Magnesium        |
| <i>DB01151</i> | Desipramine      | <i>DB01220</i> | Rifaximin        | <i>DB01393</i> | Bezafibrate      |
| <i>DB01156</i> | Bupropion        | <i>DB01221</i> | Ketamine         | <i>DB01394</i> | Colchicine       |
| <i>DB01157</i> | Trimetrexate     | <i>DB01222</i> | Budesonide       | <i>DB01399</i> | Salsalate        |

| <b>DBID</b>    | <b>Drug Name</b>     | <b>DBID</b>    | <b>Drug Name</b> | <b>DBID</b>    | <b>Drug Name</b>     |
|----------------|----------------------|----------------|------------------|----------------|----------------------|
| <i>DB01400</i> | Neostigmine          | <i>DB01621</i> | Pipotiazine      | <i>DB06209</i> | Prasugrel            |
| <i>DB01406</i> | Danazol              | <i>DB01623</i> | Thiothixene      | <i>DB06228</i> | Rivaroxaban          |
| <i>DB01409</i> | Tiotropium           | <i>DB02300</i> | Calcipotriol     | <i>DB06274</i> | Alvimopan            |
| <i>DB01410</i> | Ciclesonide          | <i>DB04835</i> | Maraviroc        | <i>DB06287</i> | Temsirolimus         |
| <i>DB01427</i> | Amrinone             | <i>DB04839</i> | Cyproterone      | <i>DB06335</i> | Saxagliptin          |
| <i>DB01558</i> | Bromazepam           | <i>DB04844</i> | Tetrabenazine    | <i>DB06695</i> | Dabigatran etexilate |
| <i>DB01577</i> | Methamphetamine      | <i>DB04845</i> | Ixabepilone      | <i>DB06698</i> | Betahistine          |
| <i>DB01586</i> | Ursodeoxycholic acid | <i>DB04861</i> | Nebivolol        | <i>DB06699</i> | Degarelix            |
| <i>DB01591</i> | Solifenacin          | <i>DB04868</i> | Nilotinib        | <i>DB06700</i> | Desvenlafaxine       |
| <i>DB01595</i> | Nitrazepam           | <i>DB04896</i> | Milnacipran      | <i>DB06702</i> | Fesoterodine         |
| <i>DB01611</i> | Hydroxychloroquine   | <i>DB04930</i> | Permethrin       | <i>DB06710</i> | Methyltestosterone   |
| <i>DB01612</i> | Amyl Nitrite         | <i>DB05246</i> | Methsuximide     | <i>DB06711</i> | Naphazoline          |
| <i>DB01618</i> | Molindone            | <i>DB05271</i> | Rotigotine       | <i>DB06802</i> | Nepafenac            |

Drugs were obtained from the DrugBank database<sup>2</sup>, and their side effects were collected from the SIDER database<sup>3</sup>.

**Table 2 | The keywords used in the filtering of the DrugBank database and their occurrences**

| Keyword             | Mark                   | Occurrences |
|---------------------|------------------------|-------------|
| „cancer”/           | Anti-cancer            | 172         |
| „lymphoma”/         |                        |             |
| „carcinoma”/        |                        |             |
| „leukemia”/         |                        |             |
| „tumor”             |                        |             |
| „colon”/            | Anti-colorectal cancer | 11          |
| „colorectal”/       |                        |             |
| „carcinoma”/        |                        |             |
| „cancer”/           |                        |             |
| „tumor”             |                        |             |
| „diabetes mellitus” | Anti-diabetes          | 36          |

The keywords are listed which were used in the filtering of the DrugBank database<sup>2</sup> and their occurrences is noted. The plus sign (+) represents the “AND” logical operator, the slash (/) represents the “OR” logical operator.

**Table 3 | Drugs obtained from the DrugBank database, which are used in the treatment of colorectal cancer and have no reported side effects in the SIDER database and their target proteins**

| <b>DrugBank ID</b> | <b>Drug Name</b> | <b>Drug Target Proteins</b>                                                            |
|--------------------|------------------|----------------------------------------------------------------------------------------|
| <i>DB00002</i>     | Cetuximab        | O75015, P00533, P00736, P02745, P02746, P02747, P09871, P12314, P12318, P31994         |
| <i>DB00112</i>     | Bevacizumab      | O75015, P00736, P02745, P02746, P02747, P12314, P12318, P31994                         |
| <i>DB00113</i>     | Arcitumomab      | P13688                                                                                 |
| <i>DB00544</i>     | Fluorouracil     | P04818                                                                                 |
| <i>DB00848</i>     | Levamisole       | P10696, P32297                                                                         |
| <i>DB01269</i>     | Panitumumab      | P00533                                                                                 |
| <i>DB01873</i>     | Epothilone D     | P04350, P07437, P68363, P68366, P68371, Q13509, Q13748, Q71U36, Q9BQE3, Q9H4B7, Q9NY65 |

Drugs and their targets were obtained from the DrugBank database<sup>2</sup>. Only those drugs were selected, which are used in the treatment of colorectal cancer and have no reported side effects in the SIDER database<sup>3</sup>. Target proteins for each drug were identified by their UniProt ID<sup>9</sup>.

**Table 4 | Drugs obtained from the DrugBank database, which are used in the treatment of colorectal cancer and have known side effects in the SIDER database and their target proteins**

| <b>Drugbank ID</b> | <b>Drug Name</b> | <b>Drug Target Proteins</b> |
|--------------------|------------------|-----------------------------|
| <i>DB00650</i>     | Leucovorin       | P04818                      |
| <i>DB00762</i>     | Irinotecan       | P11387                      |
| <i>DB01101</i>     | Capecitabine     | P04818                      |
| <i>DB01157</i>     | Trimetrexate     | P00374                      |

Drugs and their targets were obtained from the DrugBank database<sup>2</sup>. Only those drugs were selected, which are used in the treatment of colorectal cancer and have known side effects in the SIDER database<sup>3</sup>. Target proteins for each drug were identified by their UniProt ID<sup>9</sup>.

**Table 5 | Drugs obtained from the DrugBank database, which are used in the treatment of type 2 diabetes and have no reported side effects in the SIDER database and their target proteins**

| <b>DrugBank ID</b>    | <b>Drug Name</b>    | <b>Drug Target Proteins</b>                                                                            |
|-----------------------|---------------------|--------------------------------------------------------------------------------------------------------|
| <i><b>DB00030</b></i> | Insulin recombinant | P06213, P06400, P07339, P08069, P14735, P16519, P16870, P29120, P48745, P98164, Q16270, Q96C24         |
| <i><b>DB00071</b></i> | Insulin, porcine    | P01906, P06213, P06400, P07339, P08069, P14735, P16519, P16870, P29120, P48745, P98164, Q16270, Q96C24 |
| <i><b>DB00414</b></i> | Acetohexamide       | P48048                                                                                                 |
| <i><b>DB00722</b></i> | Lisinopril          | P12821, Q9BYF1                                                                                         |
| <i><b>DB00914</b></i> | Phenformin          | Q13131, Q15842                                                                                         |
| <i><b>DB01124</b></i> | Tolbutamide         | P48048, Q09428                                                                                         |
| <i><b>DB01251</b></i> | Gliquidone          | Q09428, Q15842                                                                                         |
| <i><b>DB01289</b></i> | Glisoxepide         | Q09428, Q15842                                                                                         |
| <i><b>DB01307</b></i> | Insulin Detemir     | P06213                                                                                                 |
| <i><b>DB01309</b></i> | Insulin Glulisine   | P06213                                                                                                 |
| <i><b>DB01382</b></i> | Glycodiazine        | P48048, Q09428                                                                                         |
| <i><b>DB04876</b></i> | Vildagliptin        | P27487                                                                                                 |
| <i><b>DB06655</b></i> | Liraglutide         | P43220                                                                                                 |

Drugs and their targets were obtained from the DrugBank database<sup>2</sup>. Only those drugs were selected, which are used in the treatment of type 2 diabetes and have no reported side effects in the SIDER database<sup>3</sup>. Target proteins for each drug were identified by their UniProt ID<sup>9</sup>.



**Table 6 | Drugs obtained from the DrugBank database, which are used in the treatment of type 2 diabetes and have known side effects in the SIDER database and their target proteins**

| <b>Drugbank ID</b> | <b>Drug Name</b> | <b>Drug Target Proteins</b>                    |
|--------------------|------------------|------------------------------------------------|
| <i>DB00046</i>     | Insulin Lispro   | P06213, P08069                                 |
| <i>DB00047</i>     | Insulin Glargine | P06213, P08069                                 |
| <i>DB00178</i>     | Ramipril         | P12821                                         |
| <i>DB00197</i>     | Troglitazone     | O60488, P05121, P11474, P37231, P62508, Q99808 |
| <i>DB00222</i>     | Glimepiride      | P48048, Q09428, Q14654                         |
| <i>DB00412</i>     | Rosiglitazone    | O60488, P37231                                 |
| <i>DB00491</i>     | Miglitol         | P10253, Q14697, Q8TET4                         |
| <i>DB00492</i>     | Fosinopril       | P12821                                         |
| <i>DB00519</i>     | Trandolapril     | P12821                                         |
| <i>DB00731</i>     | Nateglinide      | P37231, Q09428                                 |
| <i>DB00834</i>     | Mifepristone     | P04150, P06401                                 |
| <i>DB00839</i>     | Tolazamide       | P48048                                         |
| <i>DB00881</i>     | Quinapril        | P12821                                         |
| <i>DB00912</i>     | Repaglinide      | P37231, Q09428                                 |
| <i>DB00966</i>     | Telmisartan      | P30556, P37231                                 |
| <i>DB01067</i>     | Glipizide        | P37231, Q09428                                 |
| <i>DB01132</i>     | Pioglitazone     | P37231                                         |
| <i>DB01261</i>     | Sitagliptin      | P27487                                         |
| <i>DB01276</i>     | Exenatide        | P43220                                         |
| <i>DB01278</i>     | Pramlintide      | O60894, O60895, O60896                         |
| <i>DB01306</i>     | Insulin Aspart   | P06213                                         |
| <i>DB01393</i>     | Bezafibrate      | P37231, Q03181, Q07869                         |
| <i>DB06335</i>     | Saxagliptin      | P27487                                         |

Drugs and their targets were obtained from the DrugBank database<sup>2</sup>. Only those drugs were selected, which are used in the treatment of type 2 diabetes and have known side effects in the SIDER database<sup>3</sup>. Target proteins for each drug were identified by their UniProt ID<sup>9</sup>.

**Table 7 | Mutated genes in colorectal cancer and their corresponding proteins**

| <b>Gene name</b> | <b>Protein identifier</b> |
|------------------|---------------------------|
| <i>AKT1</i>      | P31749                    |
| <i>APC</i>       | P25054                    |
| <i>BRAF</i>      | P15056                    |
| <i>CTNNB1</i>    | P35222                    |
| <i>EP300</i>     | Q09472                    |
| <i>FBXW7</i>     | Q969H0                    |
| <i>KRAS</i>      | P01116                    |
| <i>MADH4</i>     | Q13485                    |
| <i>MAP2K4</i>    | P45985                    |
| <i>MDM2</i>      | Q00987                    |
| <i>MLH1</i>      | P40692                    |
| <i>MSH2</i>      | P43246                    |
| <i>MSH6</i>      | P52701                    |
| <i>PIK3CA</i>    | P42336                    |
| <i>PIK3R1</i>    | P27986                    |
| <i>TCF7L2</i>    | Q9NQB0                    |
| <i>TP53</i>      | P04637                    |
| <i>VTI1A</i>     | Q96AJ9                    |

The 18 mutated genes in colorectal cancer were obtained from the Cancer Gene Census<sup>10</sup> and the proteins coded by them were mapped by PICR<sup>11</sup>.

**Table 8 | Mutated genes in type 2 diabetes and their corresponding proteins**

| Gene name      | Protein identifier |
|----------------|--------------------|
| <i>ABCC8</i>   | Q54P13             |
| <i>CAPN10</i>  | Q9HC96             |
| <i>HNF1B</i>   | Q91910             |
| <i>GCGR</i>    | P30082             |
| <i>TCF7L2</i>  | Q9NQB0*            |
| <i>PPARG</i>   | O18924             |
| <i>KCNJ11</i>  | O02822             |
| <i>WFS1</i>    | P56695             |
| <i>HNF1B</i>   | Q91910             |
| <i>SLC30A8</i> | Q5I020             |
| <i>HHEX</i>    | D2KQB0             |
| <i>CDKALI</i>  | Q5VV42*            |
| <i>IGF2BP2</i> | Q9Y6M1*            |
| <i>CDKN2A</i>  | O77617             |
| <i>CDKN2B</i>  | P42772*            |
| <i>FTO</i>     | Q9C0B1*            |
| <i>JAZF1</i>   | Q80ZQ5             |
| <i>CDC123</i>  | A6R687             |
| <i>CAMK1D</i>  | Q8IU85*            |
| <i>TSPAN8</i>  | Q2KIS9             |
| <i>LGR5</i>    | Q9Z1P4             |
| <i>THADA</i>   | A8C752             |
| <i>ADAMTS9</i> | Q9P2N4             |
| <i>NOTCH2</i>  | Q04721*            |

| Gene name       | Protein identifier |
|-----------------|--------------------|
| <i>KCNQ1</i>    | P51787*            |
| <i>IRS1</i>     | Q28224             |
| <i>MTNR1B</i>   | Q8CIQ6             |
| <i>PROX1</i>    | P48437             |
| <i>GCKR</i>     | Q07071             |
| <i>ADCY5</i>    | P30803             |
| <i>UBE2E2</i>   | Q96LR5*            |
| <i>BCL11A</i>   | Q9H165*            |
| <i>GCKR</i>     | Q07071             |
| <i>DGKB</i>     | Q9Y6T7*            |
| <i>TMEM195</i>  | A0JPG8             |
| <i>C2CD4B</i>   | A6NLJ0             |
| <i>KLF14</i>    | Q9ESX2             |
| <i>ZBED3</i>    | Q96IU2             |
| <i>TP53INP1</i> | Q96A56*            |
| <i>CHCHD9</i>   | Q5T1J5             |
| <i>CENTD2</i>   | Q4LDD4             |
| <i>HMGA2</i>    | P52926*            |
| <i>HNF1A</i>    | Q90867             |
| <i>PRCI</i>     | Q94JQ6             |
| <i>ZFAND6</i>   | Q9DCH6             |
| <i>DUSP9</i>    | Q99956*            |

The 46 mutated genes in type 2 diabetes were obtained from the article of Parchwani et al.<sup>12</sup> and the proteins coded by them were mapped by PICR<sup>10</sup>. From the 46 proteins listed here only 14 were contained in the human interactome constructed from the STRING database<sup>1</sup>; those are marked with an asterisk (\*) in the Table.

**Table 9 | Average human interactome centralities of target proteins of drugs against colorectal cancer and type 2 diabetes**

| Centrality type                                                                        | Drug targets without side effects |                 |                        | Drug targets with side effects |                 |                        |
|----------------------------------------------------------------------------------------|-----------------------------------|-----------------|------------------------|--------------------------------|-----------------|------------------------|
|                                                                                        | Colorectal cancer                 | Type 2 diabetes | Statistical difference | Colorectal cancer              | Type 2 diabetes | Statistical difference |
| <b>Degree</b><br>(number of neighbours)                                                | 24.50                             | 13.00           | 0.203                  | 40.00                          | 34.00           | 0.941                  |
| <b>Closeness centrality</b><br>(1/edge)                                                | 0.305                             | 0.295           | 0.330                  | 0.301                          | 0.292           | 0.572                  |
| <b>Betweenness centrality</b><br>(fraction of shortest paths passing through the node) | 1.46E-4                           | 5.76E-4         | 0.601                  | 3.39E-4                        | 1.28E-4         | 0.944                  |

The table shows the medians of the centralities of target proteins of drugs against colorectal cancer and type 2 diabetes without or with reported side effects (the results were very similar, if instead of medians we used the arithmetic means; data not shown). Centrality values were calculated with the Pajek programme<sup>6</sup>. The human interactome containing 12,439 proteins and 174,666 edges was built from the STRING database<sup>1</sup>, 1,726 human drug targets were obtained from the DrugBank database<sup>2</sup>, and the proteins were labelled by their UniProt ID<sup>9</sup>. 99,423 drug-side effect pairs were taken from the SIDER database<sup>3</sup>. Statistical analysis was performed using the Wilcoxon rank sum (Mann-Whitney) test function of the R package<sup>5</sup>.

**Table 10 | Average network distance between drug targets without known side effects used in the treatment of colorectal cancer and colorectal cancer-associated proteins**

| <b>UniProt ID of colorectal cancer drug targets without side effects</b> | <b>Average network distance from colorectal cancer-related proteins (edges)</b> |
|--------------------------------------------------------------------------|---------------------------------------------------------------------------------|
| <i>O75015</i>                                                            | 2.500                                                                           |
| <i>P00533</i>                                                            | 1.722                                                                           |
| <i>P00736</i>                                                            | 2.722                                                                           |
| <i>P02745</i>                                                            | 2.889                                                                           |
| <i>P02746</i>                                                            | 3.000                                                                           |
| <i>P02747</i>                                                            | 3.000                                                                           |
| <i>P04350</i>                                                            | 2.278                                                                           |
| <i>P07437</i>                                                            | 2.167                                                                           |
| <i>P09871</i>                                                            | 3.000                                                                           |
| <i>P10696</i>                                                            | 3.222                                                                           |
| <i>P12314</i>                                                            | 2.722                                                                           |
| <i>P12318</i>                                                            | 2.444                                                                           |
| <i>P13688</i>                                                            | 2.444                                                                           |
| <i>P31994</i>                                                            | 2.500                                                                           |
| <i>P32297</i>                                                            | 3.056                                                                           |
| <i>P68363</i>                                                            | 2.111                                                                           |
| <i>P68366</i>                                                            | 2.000                                                                           |
| <i>P68371</i>                                                            | 2.444                                                                           |
| <i>Q13509</i>                                                            | 2.722                                                                           |
| <i>Q13748</i>                                                            | 2.111                                                                           |
| <i>Q71U36</i>                                                            | 2.111                                                                           |
| <i>Q9BQE3</i>                                                            | 2.389                                                                           |
| <i>Q9H4B7</i>                                                            | 2.778                                                                           |
| <i>Q9NY65</i>                                                            | 2.333                                                                           |
| <b>Mean network distance of drug targets</b>                             | <b>2.528</b>                                                                    |
| <b>Mean network distance of randomly selected proteins</b>               | <b>3.316</b>                                                                    |

The table shows the average network distance between drug targets without known side effects used in the treatment of colorectal cancer and colorectal cancer-related proteins. The total number of drug targets without known side effects used in the treatment of colorectal cancer was 24; the total number of colorectal cancer-related proteins was 18. Average network distances were calculated as shortest paths using the Pajek programme<sup>6</sup>. Proteins were labelled by their UniProt ID<sup>9</sup>. The human interactome containing 12,439 proteins and 174,666 edges was built from the STRING database<sup>1</sup>, 1,726 human drug targets were obtained from the DrugBank database<sup>2</sup> and 99,423 drug-side effect pairs were taken from the SIDER database<sup>3</sup>. Colorectal cancer-related proteins were obtained from the Cancer Gene Census database<sup>10</sup>. Average network distances between colorectal cancer-related proteins and at least 50 randomly selected samples of 24 proteins each were calculated, and the statistical difference in their mean values compared to the average network distance of the 24 drug targets listed above was tested using the one-way ANOVA (Analysis of Variance) with linear model fit function of the R package<sup>5</sup>. There was no statistically significant difference between the mean values of the drug targets without known side effects and the random samples,  $F=0.8807$ ,  $p=0.7078$ .

**Table 11 | Average network distance between drug targets with known side effects used in the treatment of colorectal cancer and colorectal cancer-associated proteins**

| <b>UniProt ID of colorectal cancer drug targets with side effects</b> | <b>Average network distance from colorectal cancer-related proteins (edges)</b> |
|-----------------------------------------------------------------------|---------------------------------------------------------------------------------|
| <i>P00374</i>                                                         | 2.500                                                                           |
| <i>P04818</i>                                                         | 2.556                                                                           |
| <i>P11387</i>                                                         | 2.111                                                                           |
| <b><i>Mean network distance of drug targets</i></b>                   | <b>2.389</b>                                                                    |
| <b><i>Mean network distance of randomly selected proteins</i></b>     | <b>3.240</b>                                                                    |

The table shows the average network distance between drug targets with known side effects used in the treatment of colorectal cancer and colorectal cancer-related proteins. The total number of drug targets with known side effects used in the treatment of colorectal cancer was 3; the total number of colorectal cancer-related proteins was 18. Average network distances were calculated as shortest paths using the Pajek programme<sup>6</sup>. Proteins were labelled by their UniProt ID<sup>9</sup>. The human interactome containing 12,439 proteins and 174,666 edges was built from the STRING database<sup>1</sup>, 1,726 human drug targets were obtained from the DrugBank database<sup>2</sup> and 99,423 drug-side effect pairs were taken from the SIDER database<sup>3</sup>. Colorectal cancer-related proteins were obtained from the Cancer Gene Census database<sup>10</sup>. Average network distances between colorectal cancer related proteins and at least 50 randomly selected samples of 3 proteins each were calculated, and the statistical difference in their mean values compared to the average network distance of the 3 drug targets listed above was tested using the one-way ANOVA (Analysis of Variance) with linear model fit function of the R package<sup>5</sup>. There was no statistically significant difference between the mean values of the drug targets with known side effects and the random samples,  $F=1.223$ ,  $p=0.1951$ .

**Table 12 | Average network distance between drug targets without known side effects used in the treatment of type 2 diabetes and diabetes-associated proteins**

| <b>UniProt ID of type 2 diabetes drug targets without side effects</b> | <b>Average network distance from diabetes-related proteins (edges)</b> |
|------------------------------------------------------------------------|------------------------------------------------------------------------|
| <i>P01906</i>                                                          | <i>3.786</i>                                                           |
| <i>P06400</i>                                                          | <i>2.286</i>                                                           |
| <i>P07339</i>                                                          | <i>3.000</i>                                                           |
| <i>P14735</i>                                                          | <i>3.214</i>                                                           |
| <i>P16519</i>                                                          | <i>3.786</i>                                                           |
| <i>P16870</i>                                                          | <i>3.286</i>                                                           |
| <i>P29120</i>                                                          | <i>3.143</i>                                                           |
| <i>P48745</i>                                                          | <i>3.214</i>                                                           |
| <i>P98164</i>                                                          | <i>3.000</i>                                                           |
| <i>Q13131</i>                                                          | <i>2.929</i>                                                           |
| <i>Q15842</i>                                                          | <i>3.714</i>                                                           |
| <i>Q16270</i>                                                          | <i>3.143</i>                                                           |
| <i>Q96C24</i>                                                          | <i>3.500</i>                                                           |
| <i>Q9BYF1</i>                                                          | <i>3.500</i>                                                           |
| <b><i>Mean network distance of drug targets</i></b>                    | <b><i>3.250</i></b>                                                    |
| <b><i>Mean network distance of randomly selected proteins</i></b>      | <b><i>3.413</i></b>                                                    |

The table shows the average network distance between drug targets without known side effects used in the treatment of type 2 diabetes and diabetes-related proteins. The total number of drug targets without known side effects used in the treatment of type 2 diabetes was 14; the total number of type 2 diabetes-related proteins contained in the human interactome was 14. Average network distances were calculated as shortest paths using the Pajek programme<sup>6</sup>. Proteins were labelled by their UniProt ID<sup>9</sup>. The human interactome containing 12,439 proteins and 174,666 edges was built from the STRING database<sup>1</sup>, 1,726 human drug targets were obtained from the DrugBank database<sup>2</sup> and 99,423 drug-side effect pairs were taken from the SIDER database<sup>3</sup>. Type 2 diabetes-related proteins were obtained from the article of Parchwani et al.<sup>12</sup>. Average network distances between type-2 diabetes related proteins and at least 50 randomly selected samples of 14 proteins each were calculated, and the statistical difference in their mean values compared to the average network distance of the 14 drug targets listed above was tested using the one-way ANOVA (Analysis of Variance) with linear model fit function of the R package<sup>5</sup>. There was no statistically significant difference between the mean values of the drug targets without known side effects and the random samples,  $F=0.7867$ ,  $p=0.8547$ .

**Table 13 | Average network distance between drug targets with known side effects used in the treatment of type 2 diabetes and diabetes-associated proteins**

| <b>UniProt ID of type 2 diabetes drug targets with side effects</b> | <b>Average network distance from diabetes-related proteins (edges)</b> |
|---------------------------------------------------------------------|------------------------------------------------------------------------|
| <i>O60488</i>                                                       | 3.643                                                                  |
| <i>O60894</i>                                                       | 3.857                                                                  |
| <i>O60895</i>                                                       | 3.857                                                                  |
| <i>O60896</i>                                                       | 3.429                                                                  |
| <i>P04150</i>                                                       | 2.429                                                                  |
| <i>P05121</i>                                                       | 2.857                                                                  |
| <i>P06213</i>                                                       | 2.643                                                                  |
| <i>P06401</i>                                                       | 2.500                                                                  |
| <i>P08069</i>                                                       | 2.571                                                                  |
| <i>P10253</i>                                                       | 3.786                                                                  |
| <i>P11474</i>                                                       | 3.000                                                                  |
| <i>P12821</i>                                                       | 3.786                                                                  |
| <i>P27487</i>                                                       | 3.500                                                                  |
| <i>P30556</i>                                                       | 3.000                                                                  |
| <i>P37231</i>                                                       | 2.643                                                                  |
| <i>P43220</i>                                                       | 3.071                                                                  |
| <i>P48048</i>                                                       | 3.214                                                                  |
| <i>P62508</i>                                                       | 3.071                                                                  |
| <i>Q03181</i>                                                       | 2.857                                                                  |
| <i>Q07869</i>                                                       | 2.714                                                                  |
| <i>Q09428</i>                                                       | 3.500                                                                  |
| <i>Q14654</i>                                                       | 3.286                                                                  |
| <i>Q14697</i>                                                       | 3.357                                                                  |
| <i>Q8TET4</i>                                                       | 3.929                                                                  |
| <i>Q99808</i>                                                       | 4.357                                                                  |
| <b><i>Mean network distance of drug targets</i></b>                 | <b>3.234</b>                                                           |
| <b><i>Mean network distance of randomly selected proteins</i></b>   | <b>3.443</b>                                                           |

The table shows the average network distance between drug targets with known side effects used in the treatment of type 2 diabetes and diabetes-related proteins. The total number of drug targets with known side effects used in the treatment of type 2 diabetes was 25; the total number of type 2 diabetes-related proteins contained in the human interactome was 14. Average network distances were calculated as shortest paths using the Pajek programme<sup>6</sup>. Proteins were labelled by their UniProt ID<sup>9</sup>. The human interactome containing 12,439 proteins and 174,666 edges was built from the STRING database<sup>1</sup>, 1,726 human drug targets were obtained from the DrugBank database<sup>2</sup> and 99,423 drug-side effect pairs were taken from the SIDER database<sup>3</sup>. Type 2 diabetes-related proteins were obtained from the article of Parchwani et al.<sup>12</sup>. Average network distances between type-2 diabetes related proteins and at least 50 randomly selected samples of 25 proteins each were calculated, and the statistical difference in their mean values compared to the average network distance of the 25 drug targets listed above was tested using the one-way ANOVA (Analysis of Variance) with linear model fit function of the R package<sup>5</sup>. There was no statistically significant difference between the mean values of the drug targets with known side effects and the random samples,  $F=0.9021$ ,  $p=0.6677$ .



## Supplementary References

1. Franceschini, A. *et al.* STRING v9.1: protein-protein interaction networks, with increased coverage and integration. *Nucleic Acids Res.* **41**, D808–D815 (2012).
2. Knox, C. *et al.* DrugBank 3.0: a comprehensive resource for ‘omics’ research on drugs. *Nucleic Acids Res.* **39**, D1035–1041 (2011).
3. Kuhn, M., Campillos, M., Letunic, I., Jensen, L. J. & Bork, P. A side effect resource to capture phenotypic effects of drugs. *Mol. Syst. Biol.* **6**, 343 (2010).
4. Szalay, K. Z. & Csermely, P. Perturbation centrality and Turbine: A novel centrality measure obtained using a versatile network dynamics tool. *PLoS ONE* **8**, e78059 (2013).
5. R Core Team. *R: A language and environment for statistical computing.* (R Foundation for Statistical Computing, 2013). at <<http://www.R-project.org/>>
6. Vladimir Bagatelj & Andrej Mrvar. in *Graph drawing software* (eds. Jünger, M. & Mutzel, P.) 77–103 (Springer, 2003). at <<http://pajek.imfm.si/>>
7. The Inkscape Team. *Inkscape.* (2014). at <<http://inkscape.org>>
8. Shannon, P. *et al.* Cytoscape: a software environment for integrated models of biomolecular interaction networks. *Genome Res.* **13**, 2498–2504 (2003).
9. The UniProt Consortium. Reorganizing the protein space at the Universal Protein Resource (UniProt). *Nucleic Acids Res.* **40**, D71–D75 (2012).
10. Forbes, S. A. *et al.* COSMIC: mining complete cancer genomes in the Catalogue of Somatic Mutations in Cancer. *Nucleic Acids Res.* **39**, D945–D950 (2010).
11. Wein, S. P. *et al.* Improvements in the Protein Identifier Cross-Reference service. *Nucleic Acids Res.* **40**, W276–280 (2012).
12. Parchwani, D., Murthy, S., Upadhyah, A. & Patel, D. Genetic factors in the etiology of type 2 diabetes: linkage analyses, candidate gene association, and genome-wide association – still a long way to go! *Natl. J. Physiol. Pharm. Pharmacol.* **3**, 57 (2013).
